# Supplementary material for: Palladium-catalyzed radical cascade difluoroalkylation/cyclization of acrylamide with ethyl difluorobromoacetate
Source: Royal Society of Chemistry journal article supplement (doi:10.1039/c6ra05744f), 2016-01-01

# Palladium-Catalyzed Radical Cascade Difluoroalkylation/Cyclization of Acrylamide with Ethyl Difluorobromoacetate

Xiao-Feng Xia, <sup>\*a</sup> Su-Li Zhu,<sup>a</sup> Yuan Li,<sup>b</sup> and Haijun Wang,<sup>a</sup>

<sup>a</sup> The Key Laboratory of Food Colloids and Biotechnology, Ministry of Education, School of Chemical and Material Engineering, Jiangnan University, Wuxi, Jiangsu, 214122, China.

<sup>b</sup> JiangSu food and pharmaceutical science college, Huaian, Jiangsu, 223001, China.

xiaxf@jiangnan.edu.cn

## Table of Contents

|   |                                                                                     |       |
|---|-------------------------------------------------------------------------------------|-------|
| 1 | <b>General Remarks</b>                                                              | S2    |
| 2 | <b>Table S1</b>                                                                     | S2    |
| 3 | <b>Reduction of 3a to 3aa</b>                                                       | S2-3  |
| 4 | <b>KIE experiment</b>                                                               | S3    |
| 5 | <b><sup>1</sup>H NMR and <sup>13</sup>C NMR spectra for compounds 3, 3aa and 4a</b> | S4-42 |

**General Remarks:** Column chromatography was carried out on silica gel. Unless noted  $^1\text{H}$  NMR spectra were recorded on 400 MHz in  $\text{CDCl}_3$ ,  $^{13}\text{C}$  NMR spectra were recorded on 100 MHz in  $\text{CDCl}_3$ ,  $^{19}\text{F}$  NMR spectra were recorded on 376 MHz in  $\text{CDCl}_3$ , and  $^{31}\text{P}$  NMR spectra were recorded on 162 MHz in  $\text{CDCl}_3$ . IR spectra were recorded on an FT-IR spectrometer and only major peaks are reported in  $\text{cm}^{-1}$ . Melting points were determined on a microscopic apparatus and were uncorrected. All new products were further characterized by HRMS (high resolution mass spectra), high resolution mass spectrometry (HRMS) spectra was obtained on a microTOF-Q instrument equipped with an ESI source; copies of their  $^1\text{H}$  NMR and  $^{13}\text{C}$  NMR spectra are provided.

**Table S1.** Optimization of reaction conditions

| Entry          | [Pd] (mol %)                        | Ligand (%)   | (mol %) | Base (equiv.)                 | Solvent | Temperature | Yield (%) |
|----------------|-------------------------------------|--------------|---------|-------------------------------|---------|-------------|-----------|
| 1              | 10% $\text{PdCl}_2(\text{PPh}_3)_2$ | 20% DPE-phos |         | 2eq. $\text{K}_2\text{CO}_3$  | dioxane | 80          | 25%       |
| 2              | 10% $\text{PdCl}_2(\text{PPh}_3)_2$ | 20% Xantphos |         | 2eq. $\text{K}_2\text{CO}_3$  | dioxane | 100         | N.R.      |
| 3              | 10% $\text{PdCl}_2(\text{PPh}_3)_2$ | 20% Xantphos |         | 2eq. $\text{Cs}_2\text{CO}_3$ | dioxane | 100         | N.R.      |
| 4              | 5% $\text{Pd}(\text{PPh}_3)_4$      | 10% DPE-phos |         | 2eq. $\text{K}_2\text{CO}_3$  | dioxane | 100         | 15%       |
| 5 <sup>a</sup> | 5% $\text{Pd}(\text{PPh}_3)_4$      | 10% DPE-phos |         | 2eq. $\text{K}_2\text{CO}_3$  | dioxane | 80          | 16%       |

a: 2 eq.  $\text{IC}_4\text{F}_9$  was used instead of  $\text{BrCF}_2\text{PO}(\text{OEt})_2$ .

### Reduction of **3a** to **3aa**

To a solution of **3a** (0.3 mmol) in THF/ $\text{H}_2\text{O}$  (50:1, 5.0 mL) was added  $\text{NaBH}_4$  (0.3 mmol) in batches at 0 °C. Then, the reaction was carried out at r.t. for 6h. After the reaction, 3 mL water was added to quench the reaction, and the resulting mixture was extracted twice with EtOAc. The combined organic extracts were washed with brine, dried over  $\text{Na}_2\text{SO}_4$  and concentrated. Purification of the crude product by flash column chromatography afforded the product **3aa** (petroleum ether/ethyl acetate as eluent (3:1)).

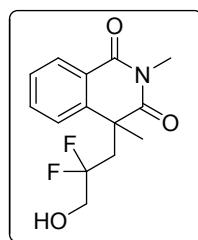

M.P.=94-95 °C, **3aa**, 72mg

$^1\text{H}$  NMR (400 MHz,  $\text{CDCl}_3$ ): 8.24-8.26 (m, 1 H), 7.62-7.66 (m, 1 H), 7.43-7.48 (m, 2 H), 3.37-

3.46 (m, 1 H), 3.34 (s, 3 H), 3.12-3.24 (m, 1 H), 2.65-2.74 (m, 2 H), 1.62 (s, 3 H);  $^{19}\text{F}$  NMR (376 MHz,  $\text{CDCl}_3$ )  $\delta$  ppm -103.07 (d,  $J = 255.68$  Hz, 1 F), -105.05 (d,  $J = 255.68$  Hz, 1 F);  $^{13}\text{C}$  NMR (100 MHz,  $\text{CDCl}_3$ ): 175.9, 164.1, 141.9, 133.5, 128.9, 127.5, 125.8, 124.3, 124.0, 121.8, 119.4, 64.6, 64.3, 64.0, 43.7, 43.5, 43.3, 31.6, 27.3; IR ( $\text{cm}^{-1}$ ): 3471, 2944, 2885, 1709, 1662, 1470, 1423, 1314, 1168, 1068, 905, 765, 702;

### KIE experiment

An oven-dried Schlenk tube (10 mL) was equipped with a magnetic stir bar, *N*-methacryloyl-*N*-methylbenzamide (**1a**, 0.2 mmol), pentadeuterated **1a-d<sub>5</sub>** (0.2 mmol), ethyl 2-bromo-2,2-difluoroacetate (**2**, 1.2 mmol), 10%  $\text{PdCl}_2(\text{PPh}_3)_2$  (0.04 mmol, 28 mg), 20% DPE-phos (0.08 mmol, 43mg), and  $\text{K}_2\text{CO}_3$  (2 equiv., 110 mg). The flask was evacuated and backfilled with Ar for 3 times. Then dioxane (3.0 mL) was added with syringe under Ar. The reaction mixture was then stirred for 10 h at 80 °C. After the reaction, 3 mL water was added to quench the reaction, and the resulting mixture was extracted twice with EtOAc. The combined organic extracts were washed with brine, dried over  $\text{Na}_2\text{SO}_4$  and concentrated. Purification of the crude product by flash column chromatography afforded the product (petroleum ether/ethyl acetate as eluent (6:1)).

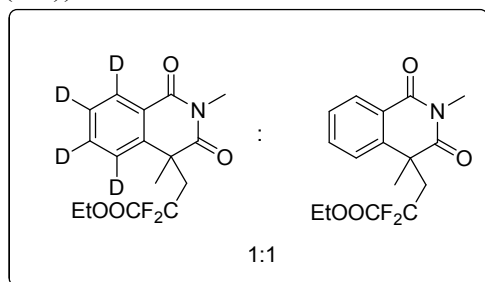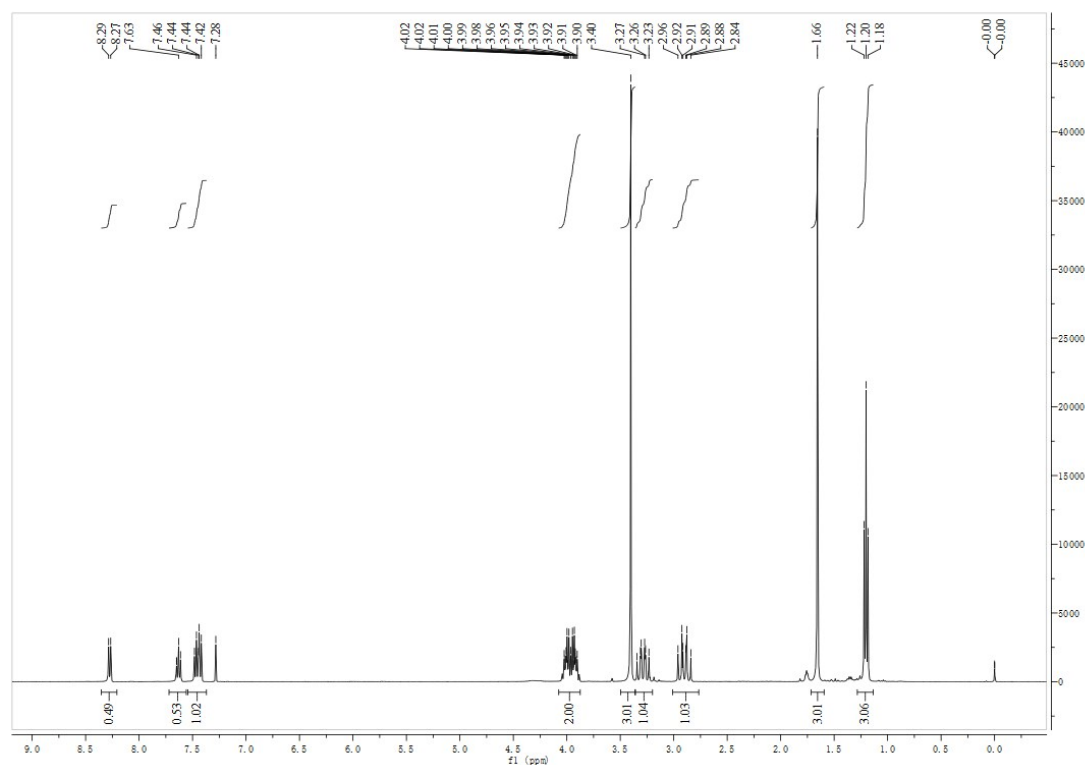

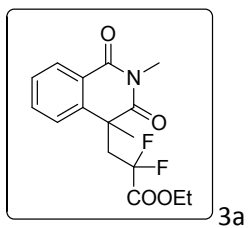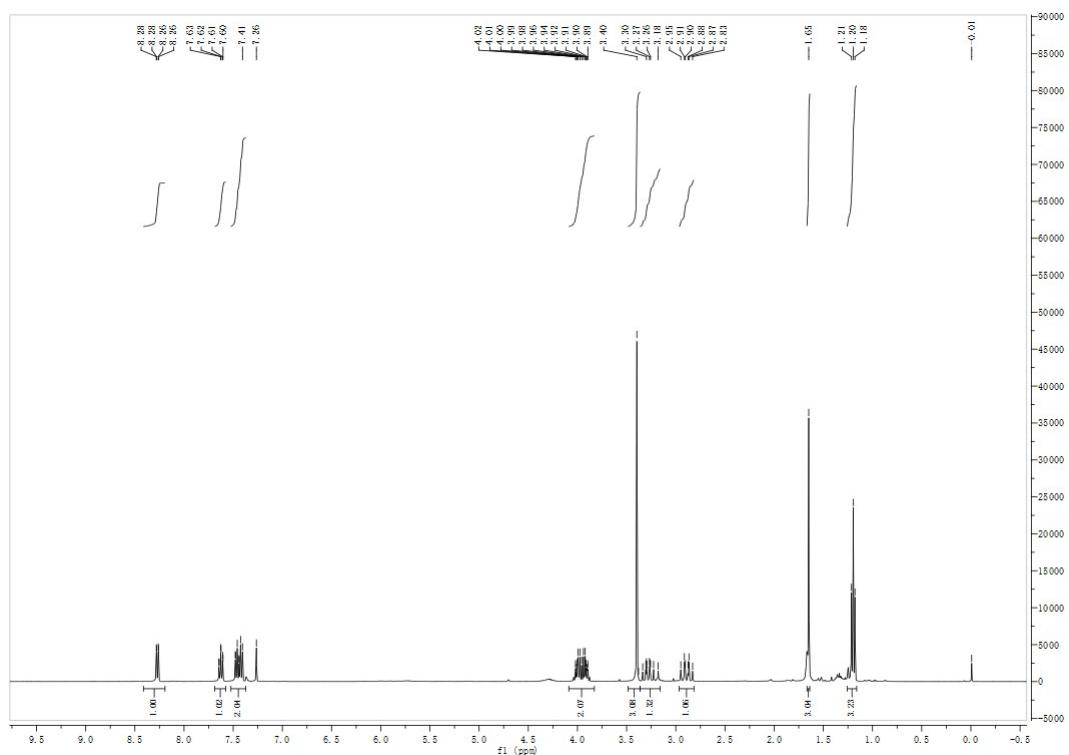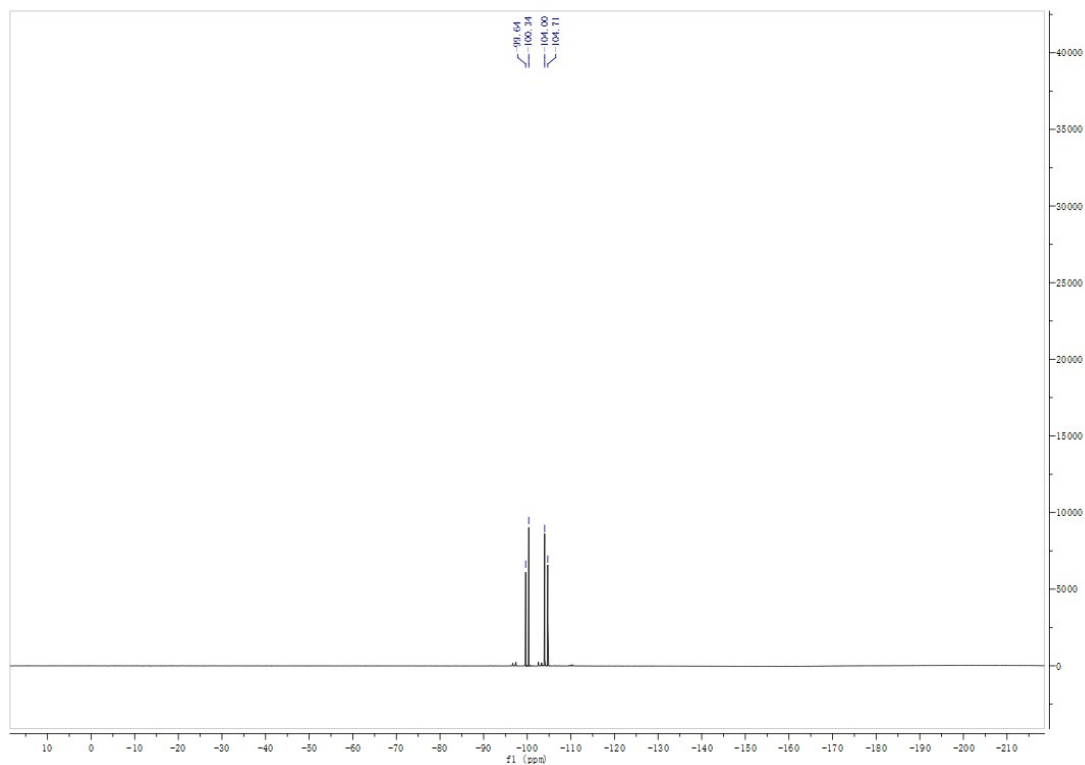

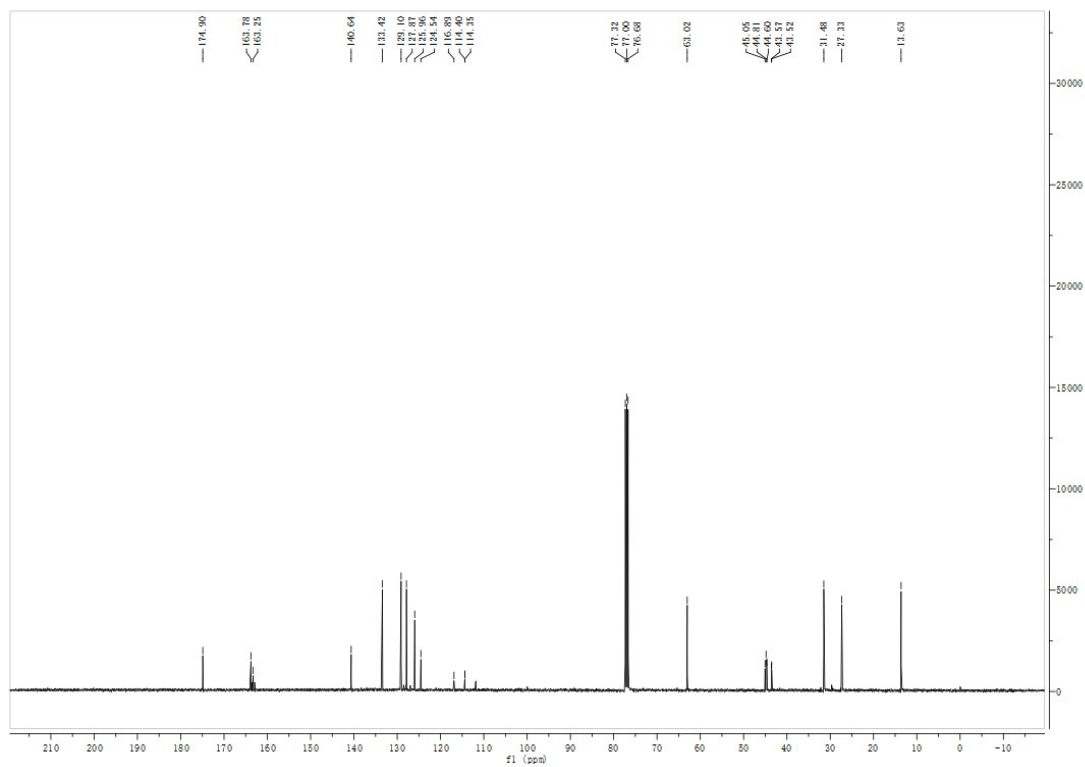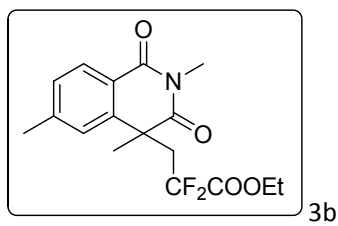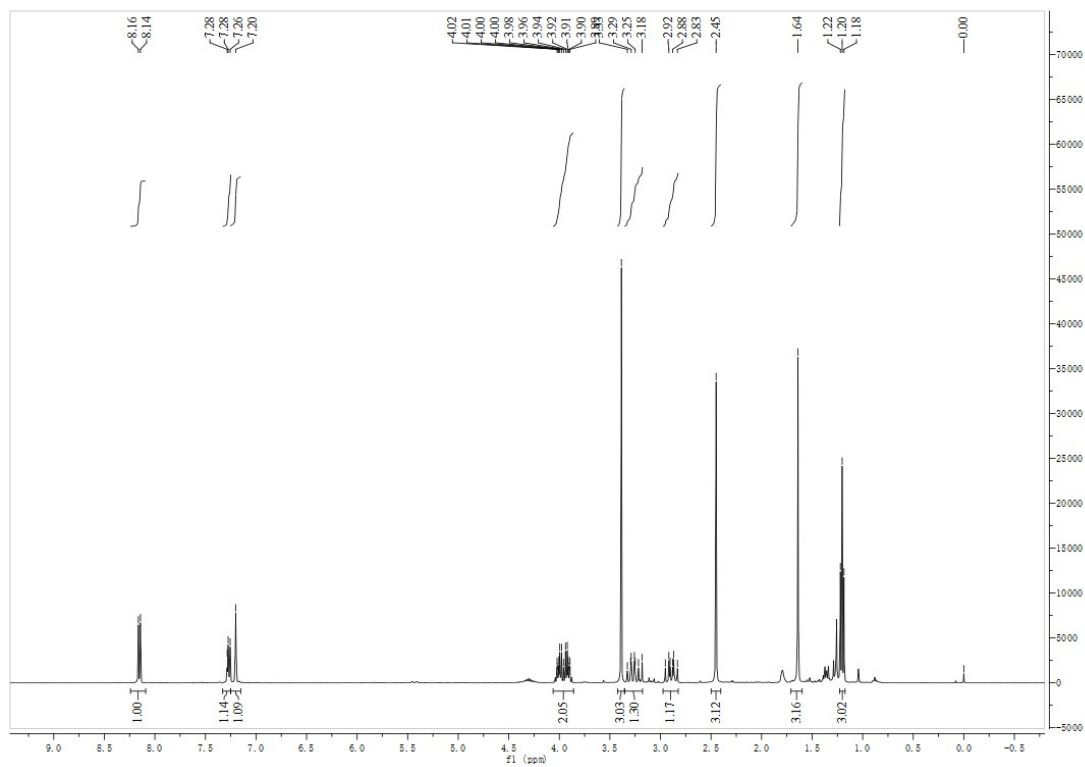

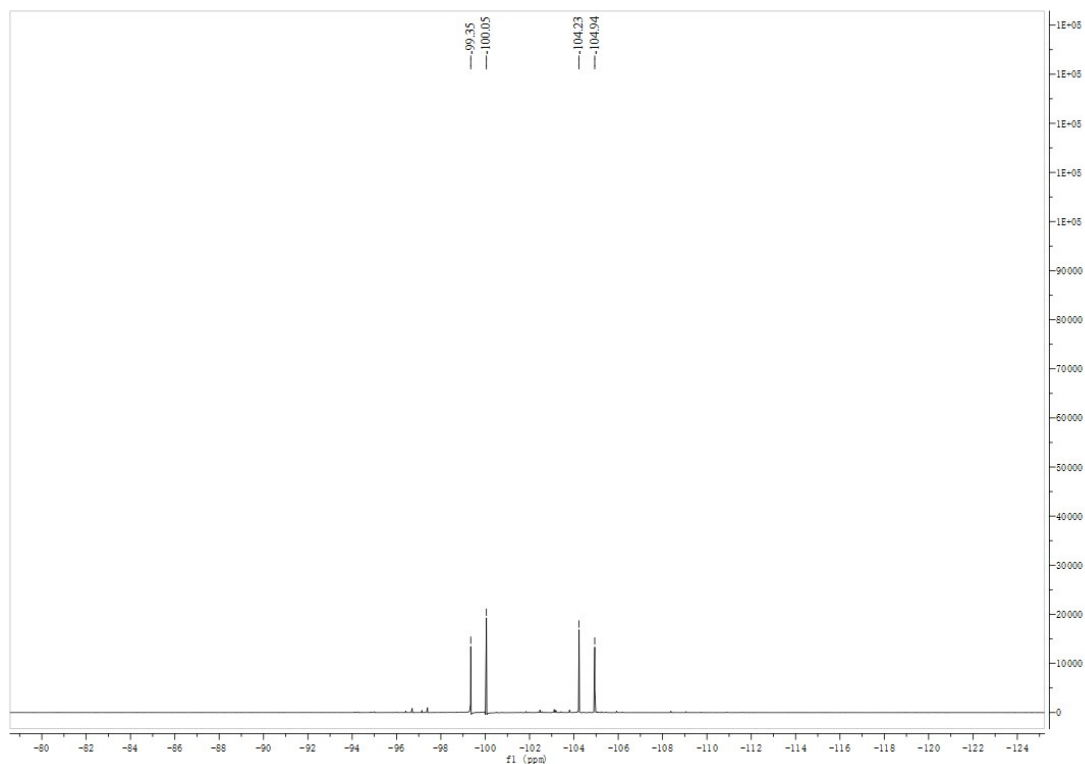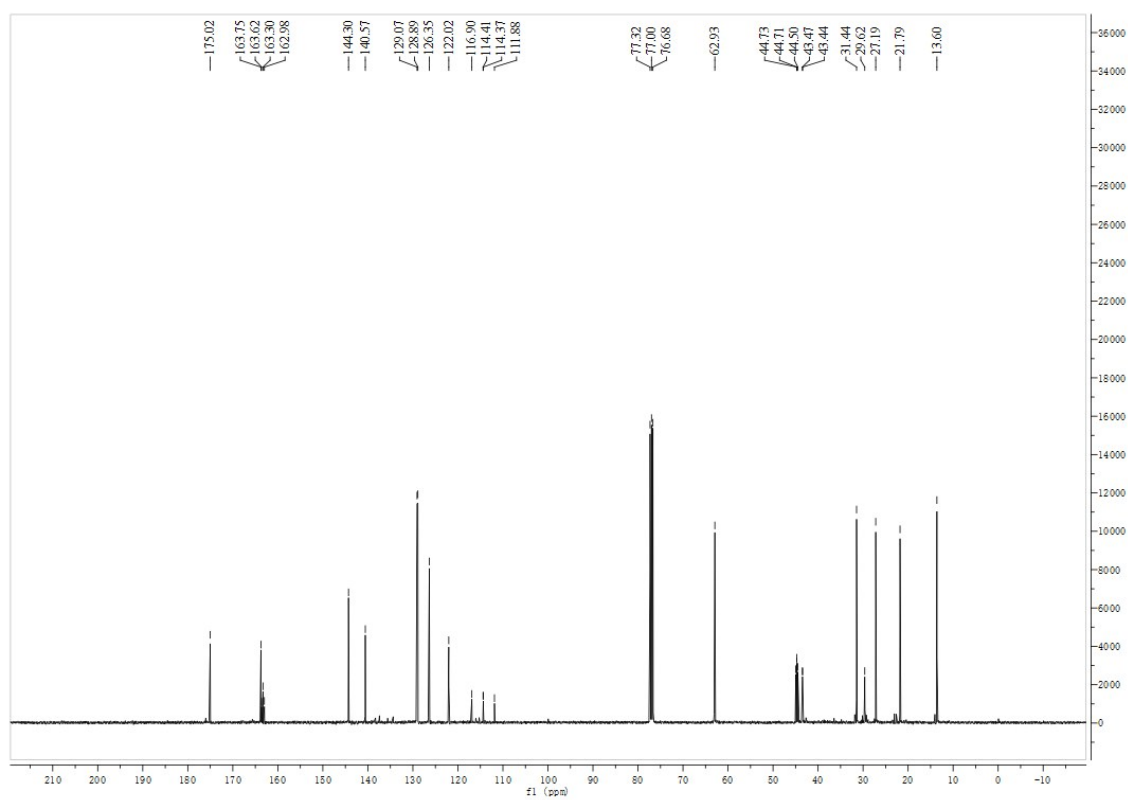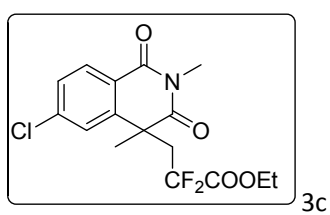

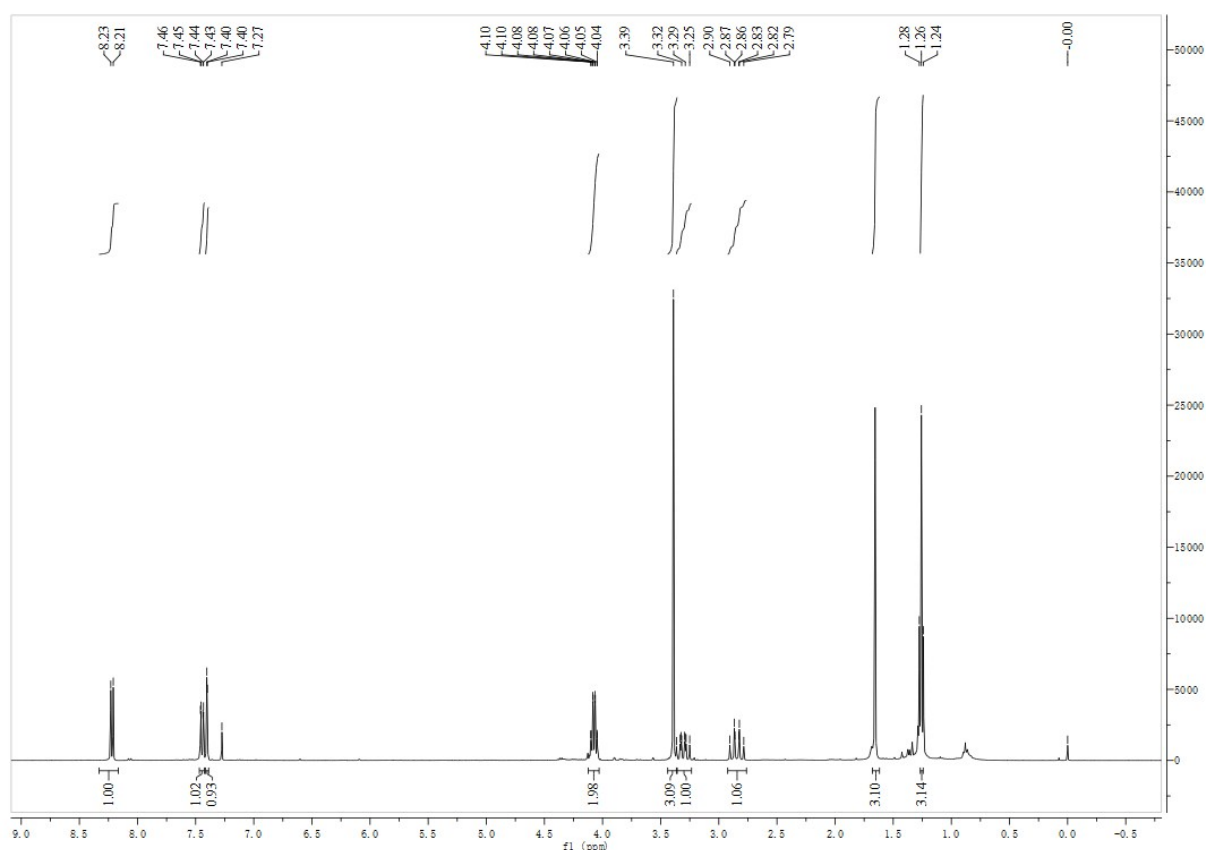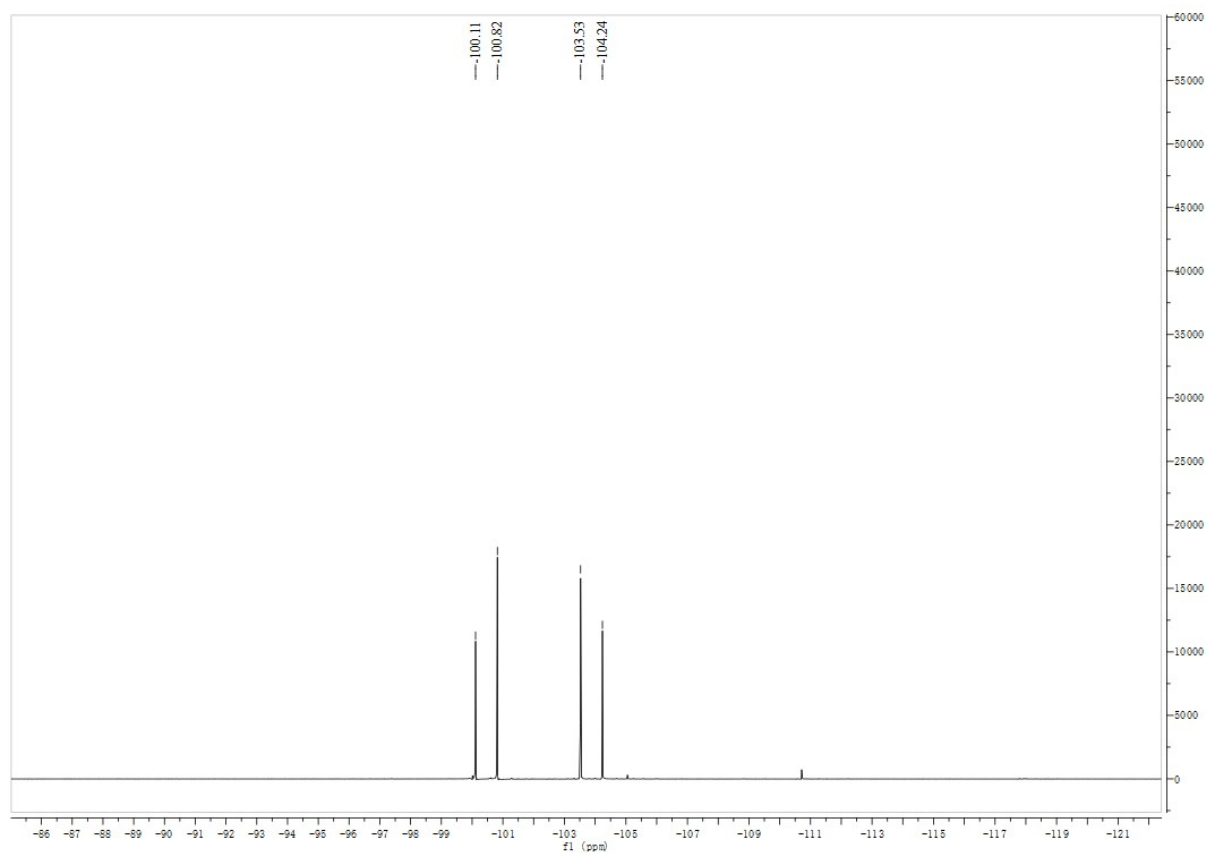

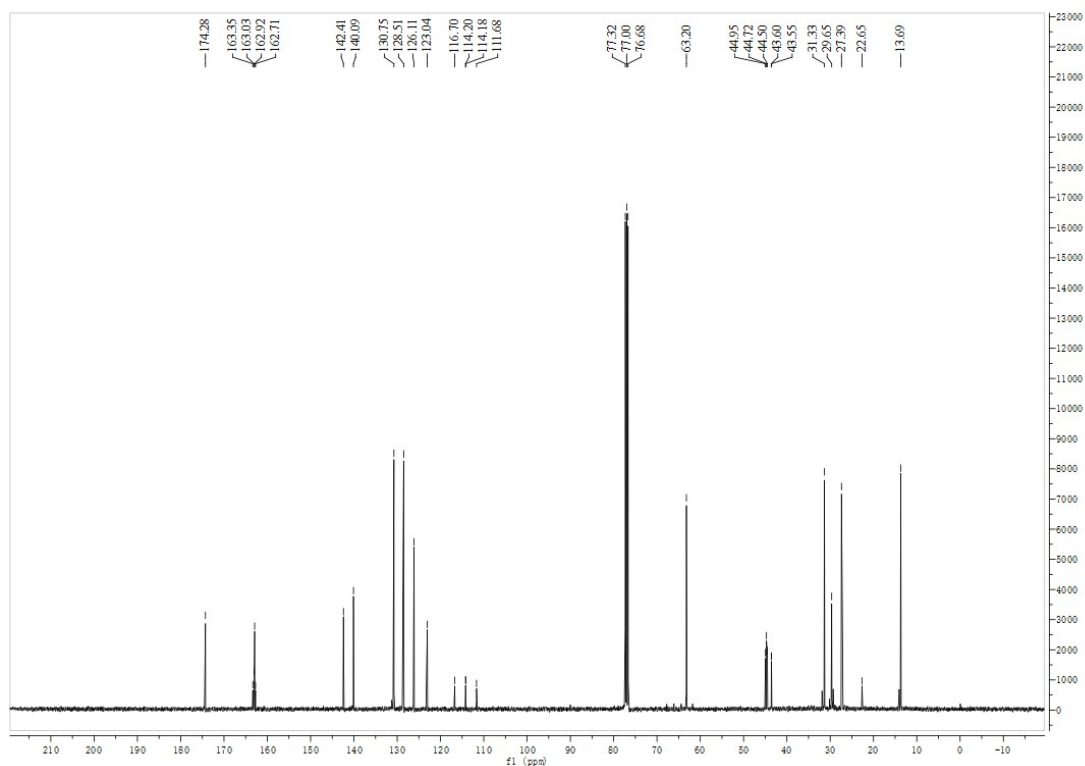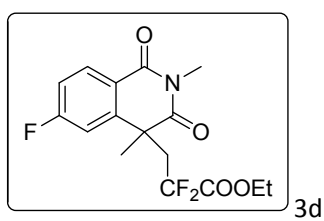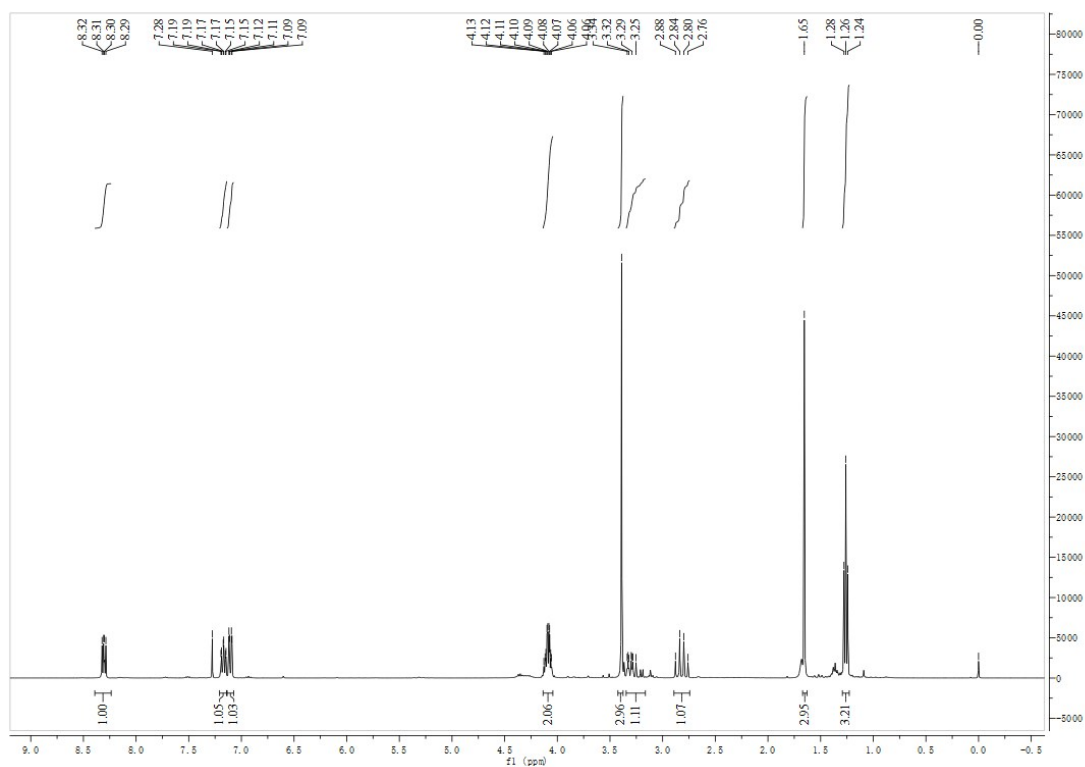

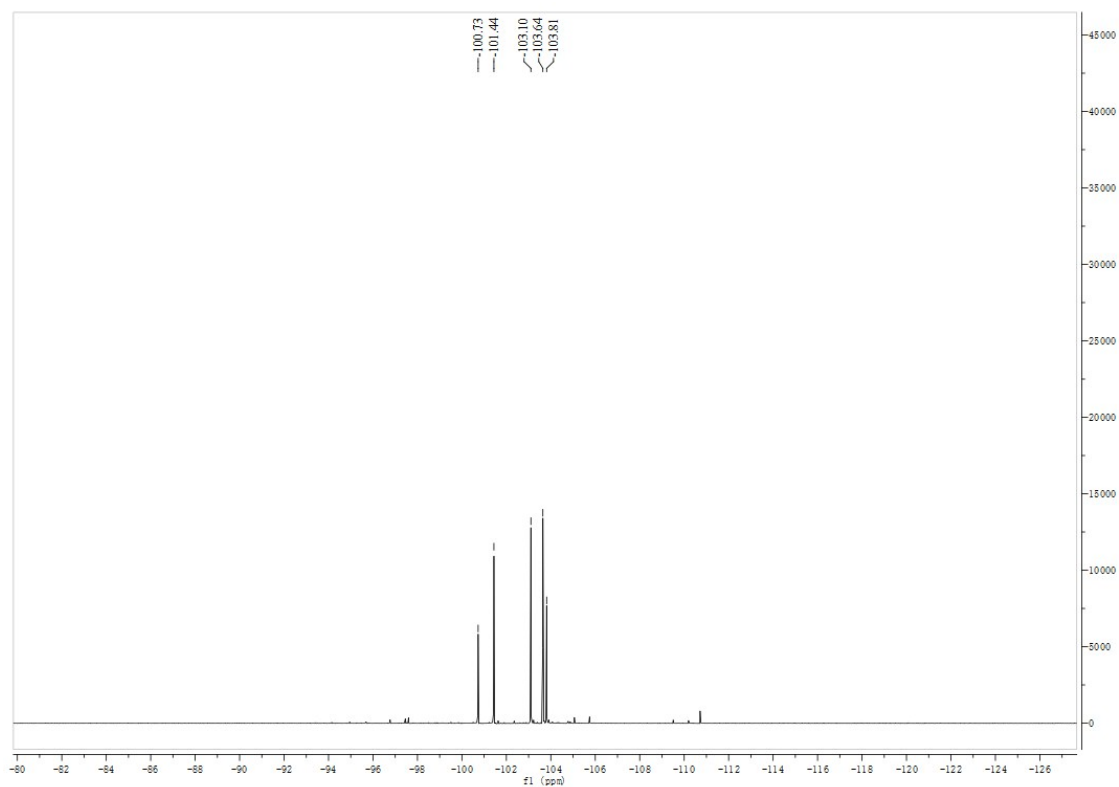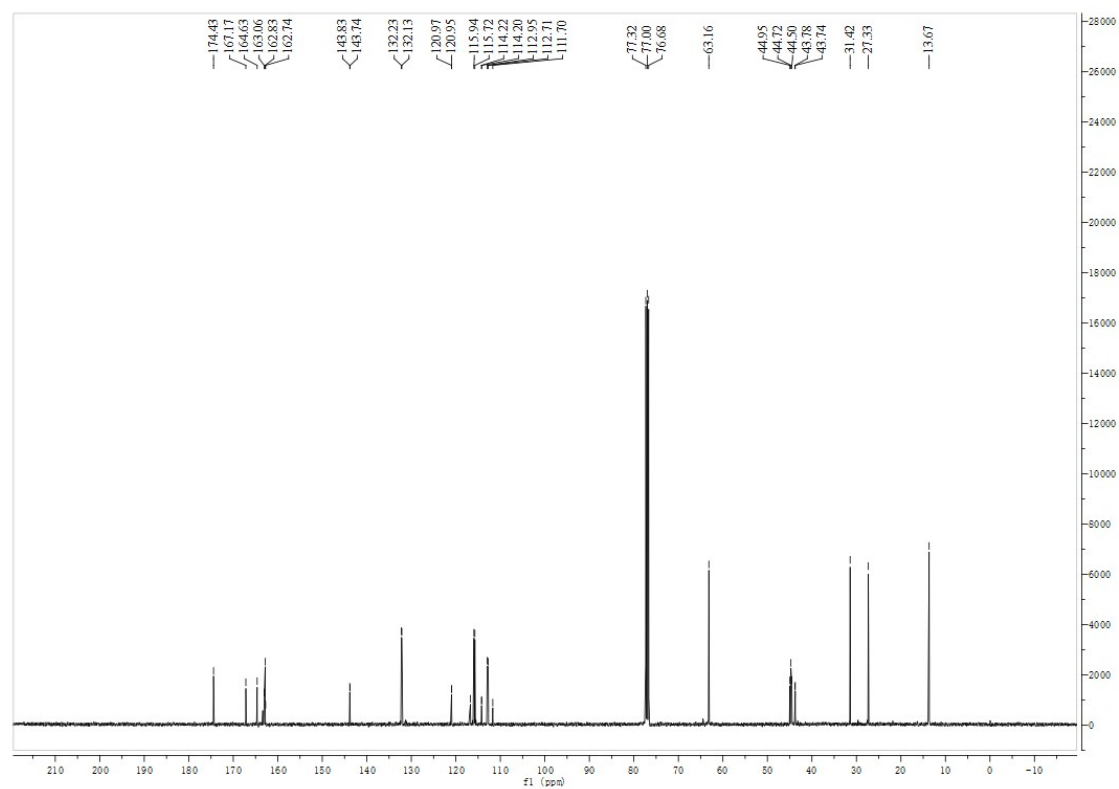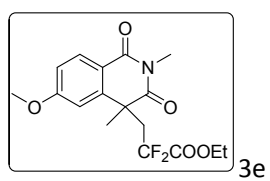

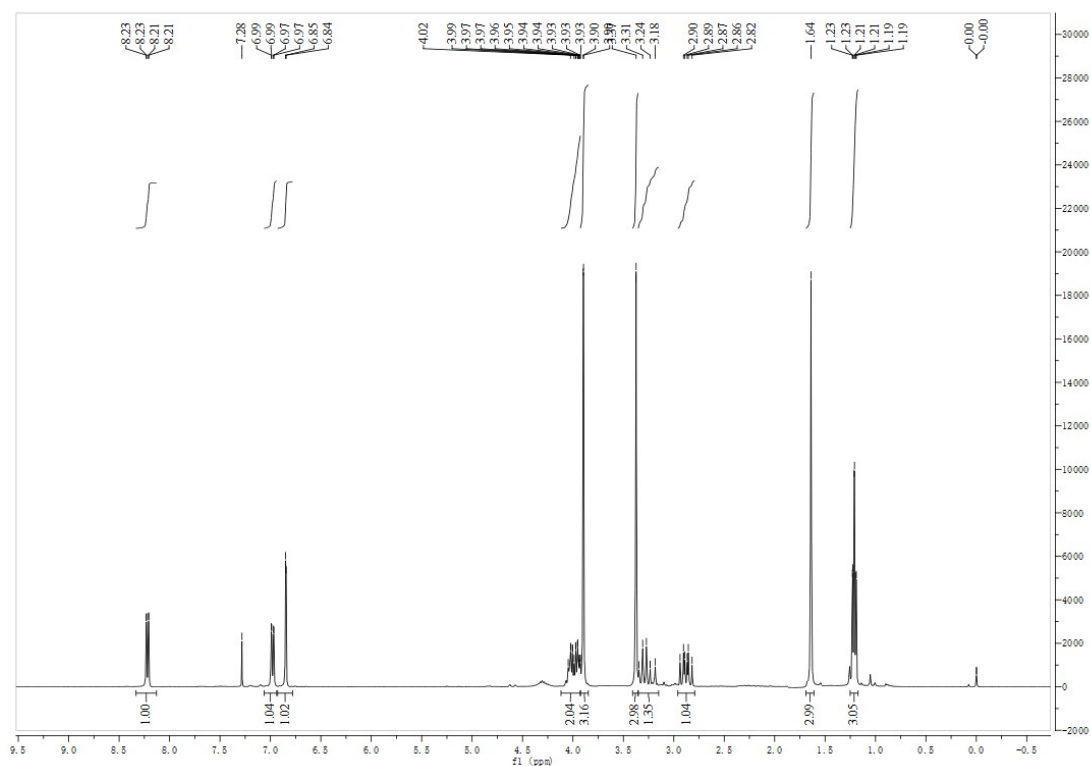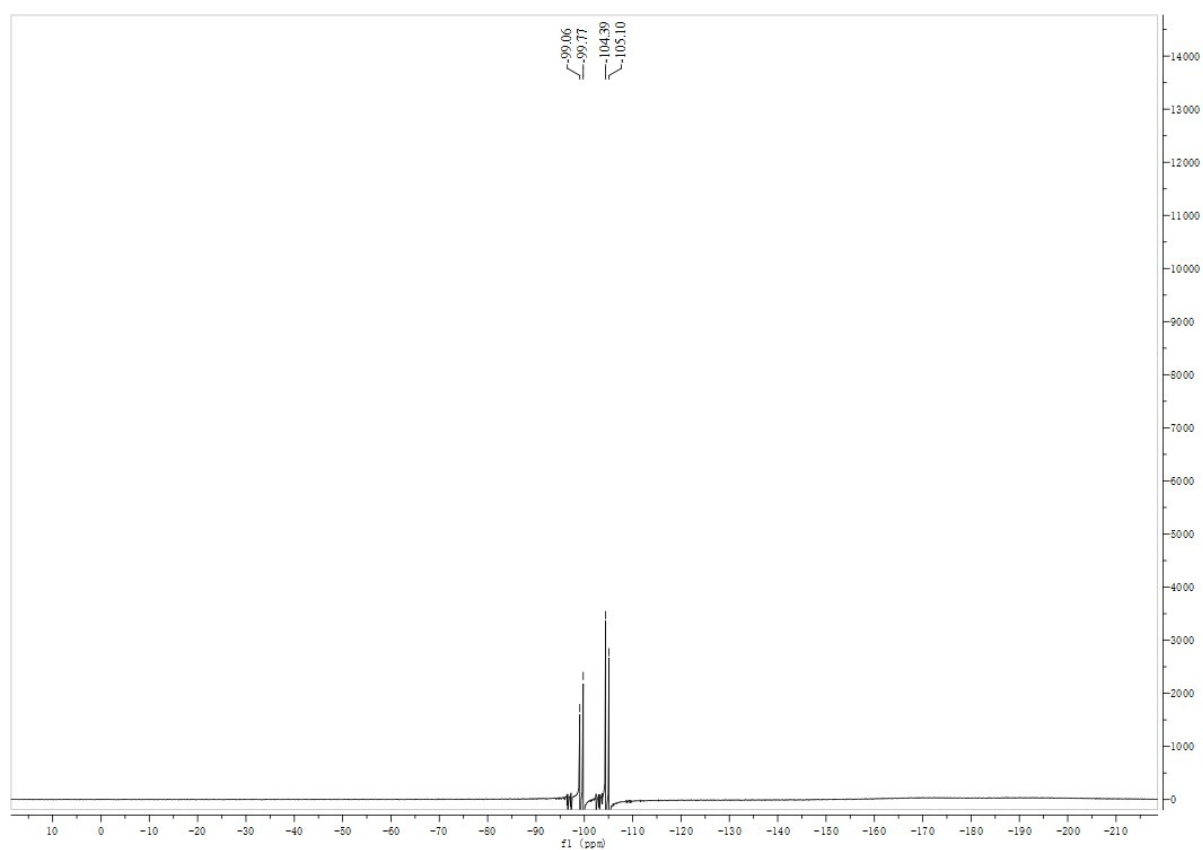

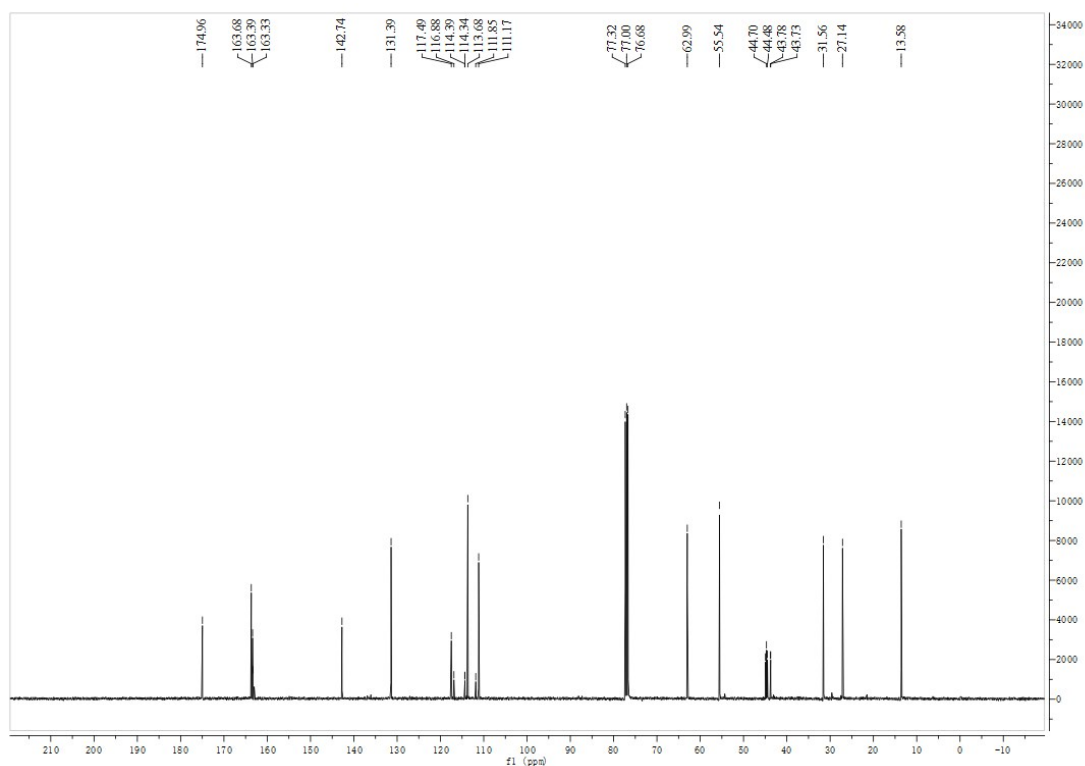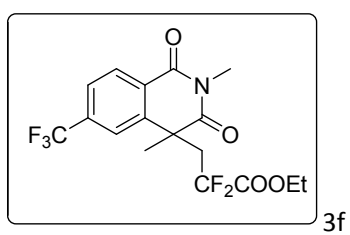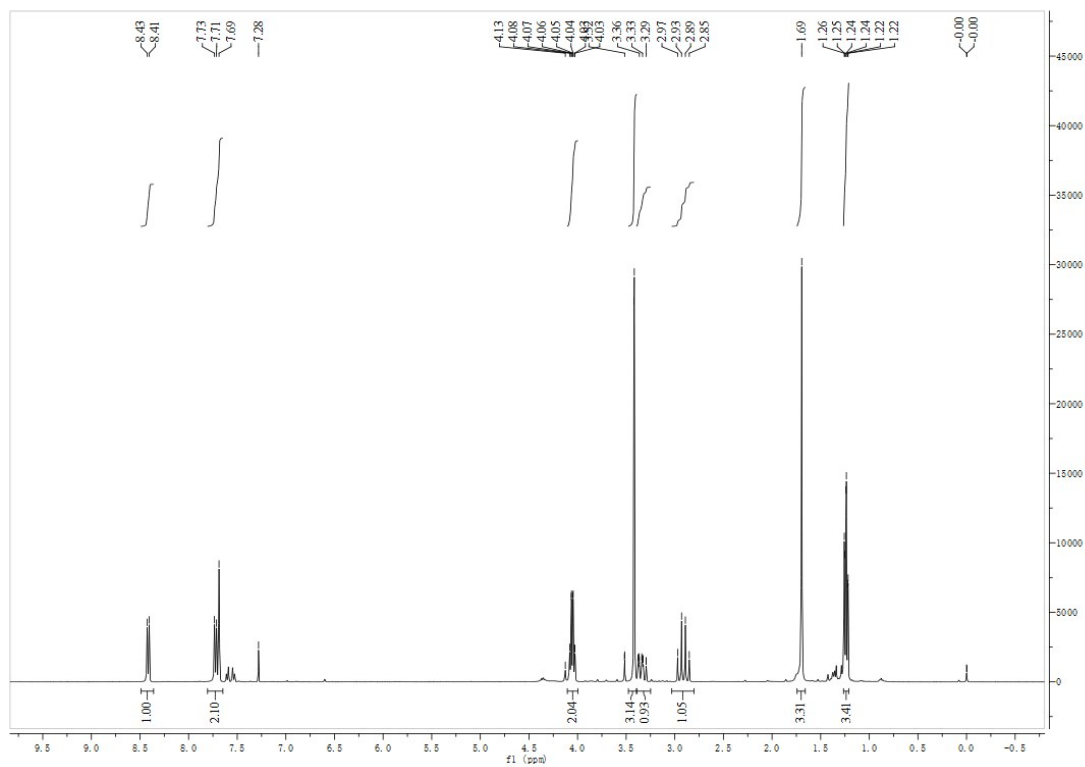

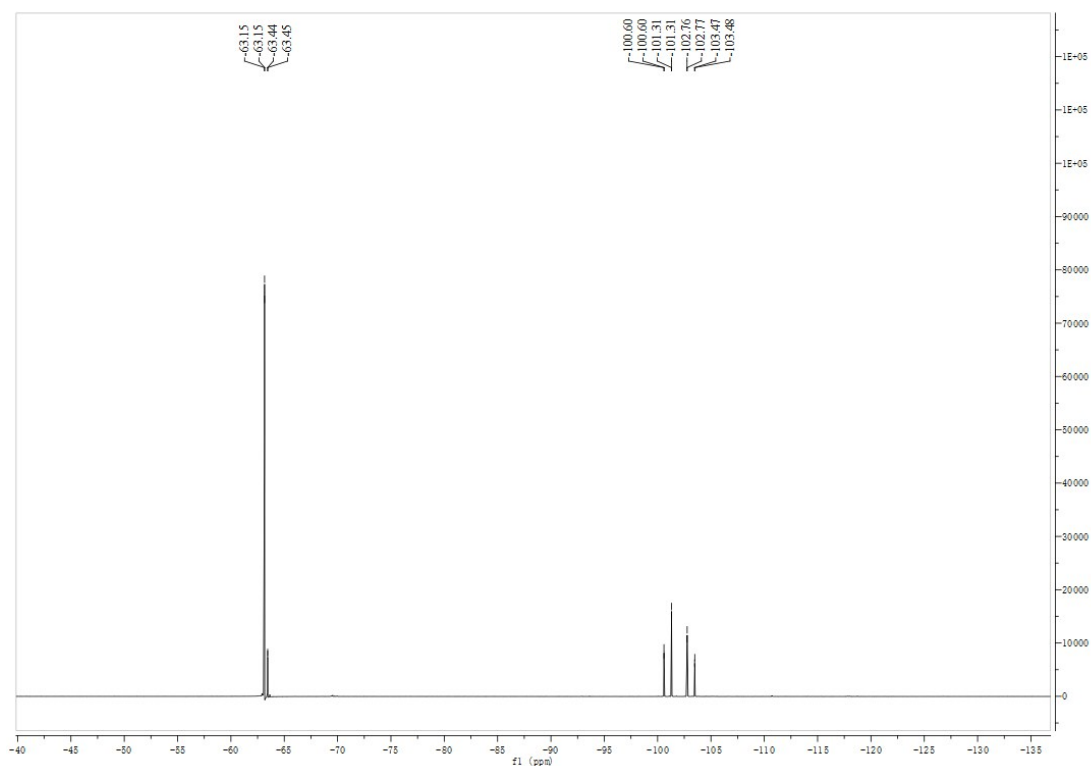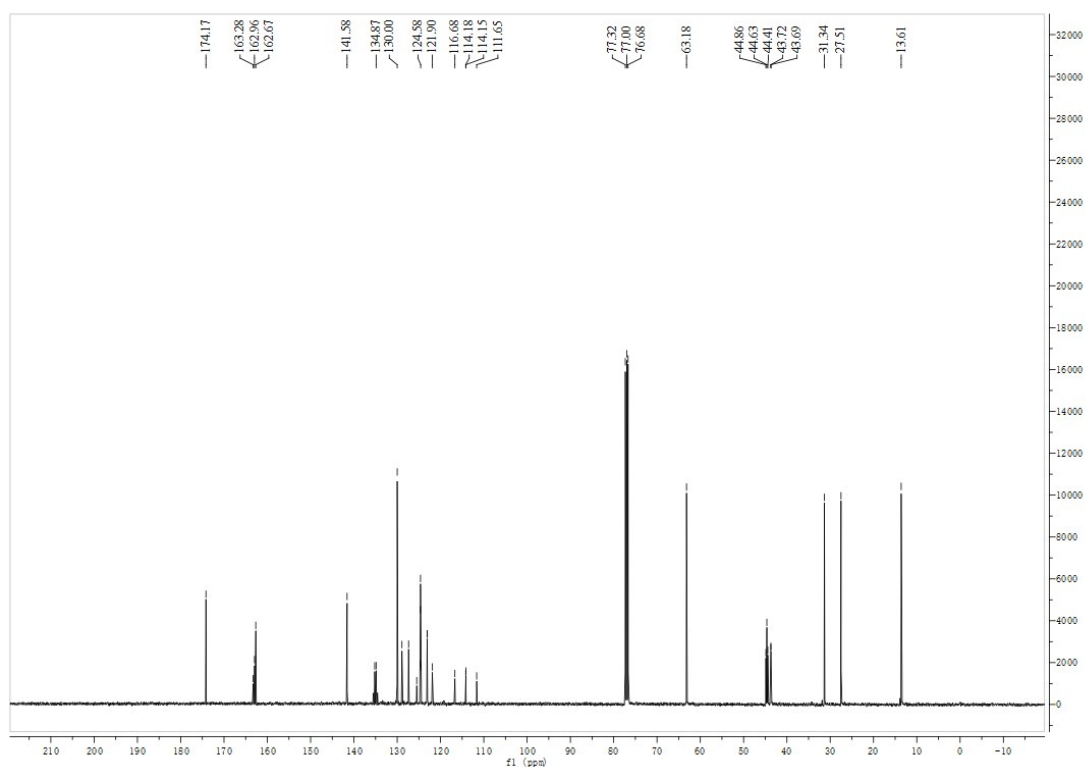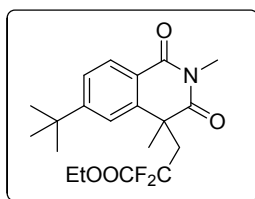

3g

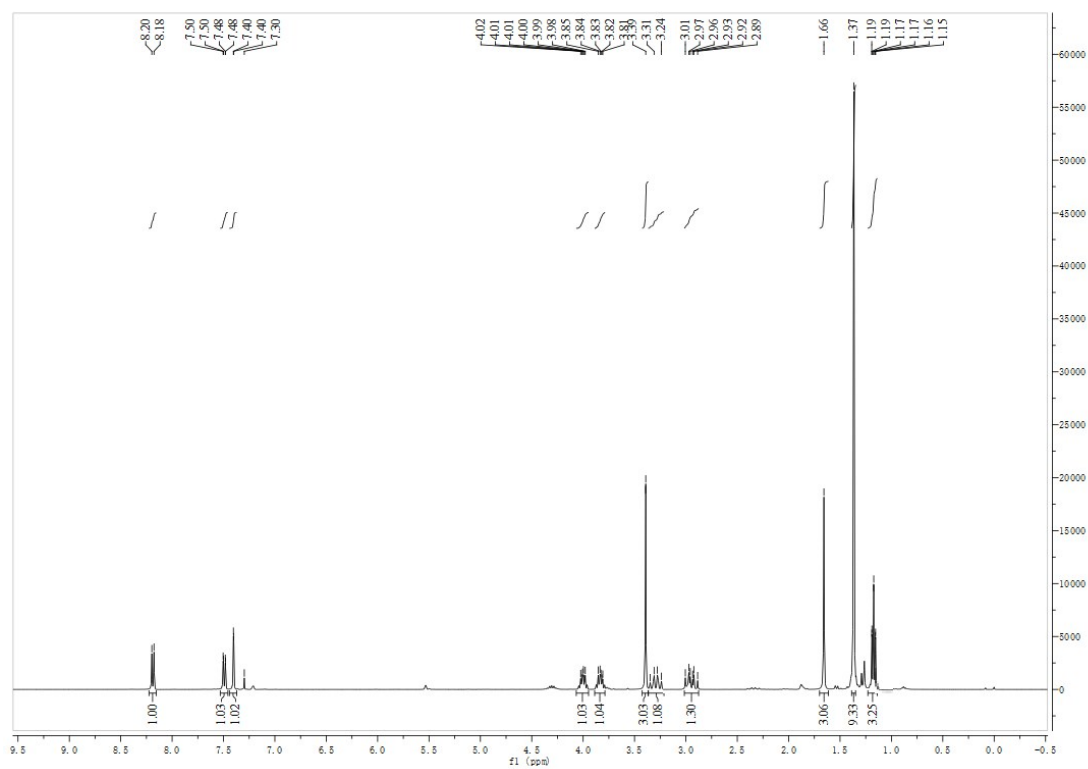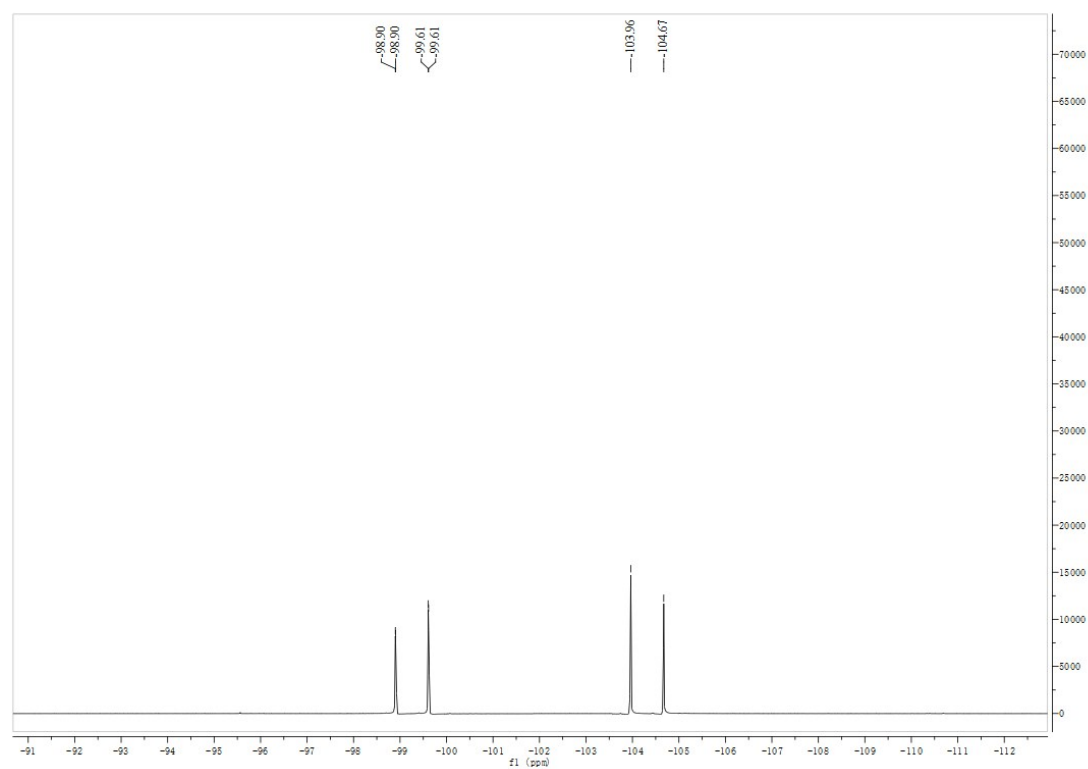

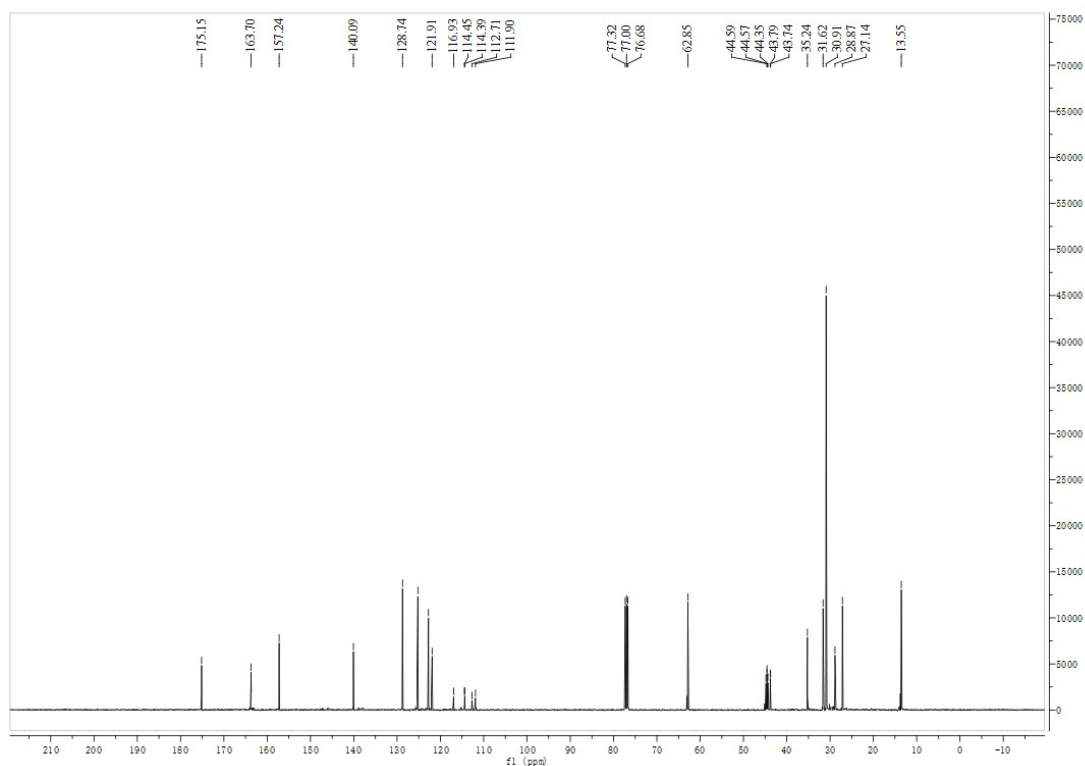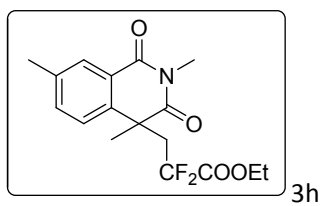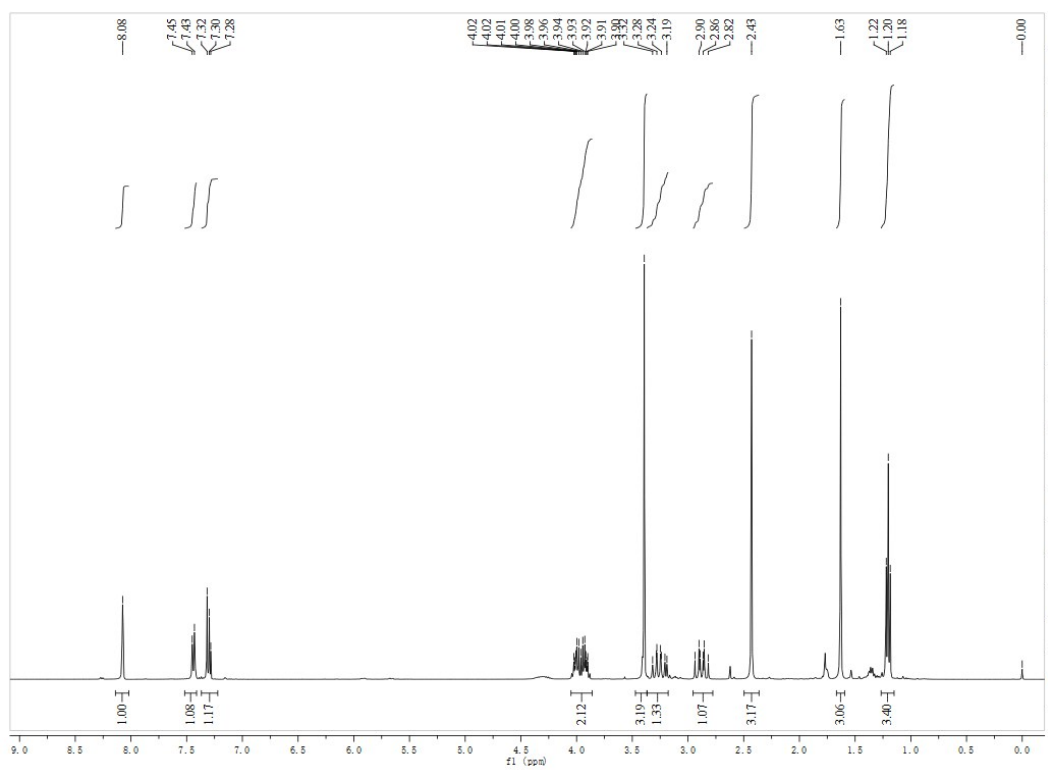

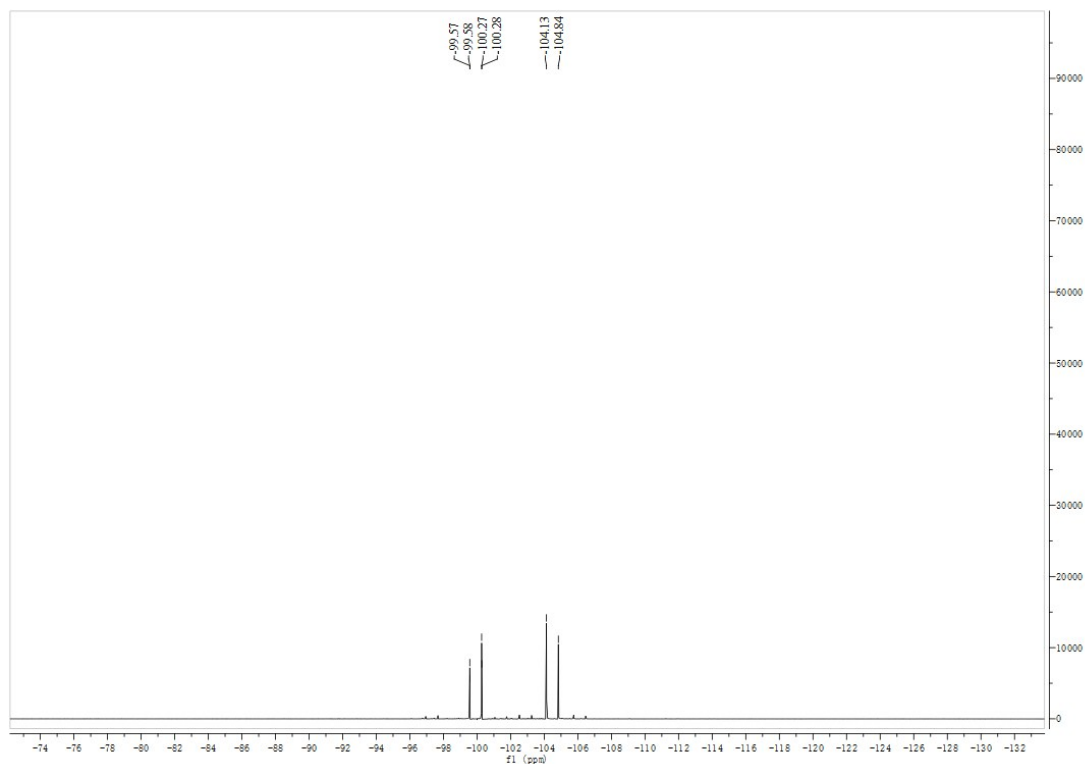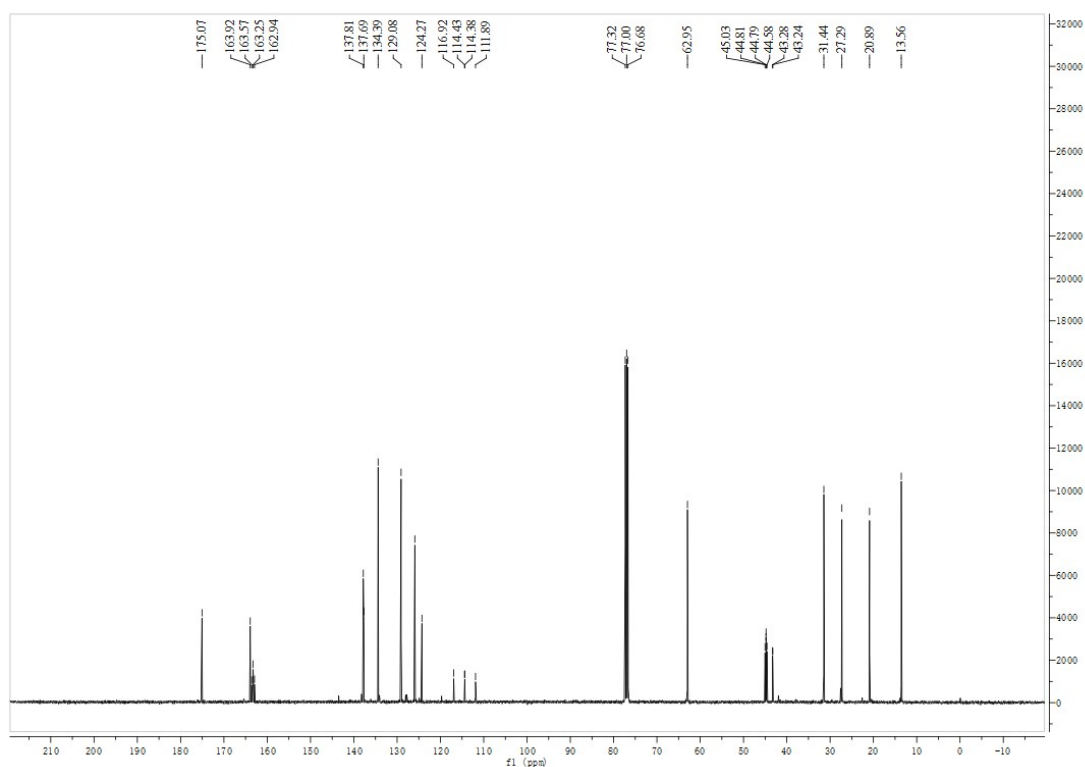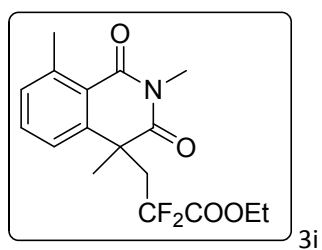



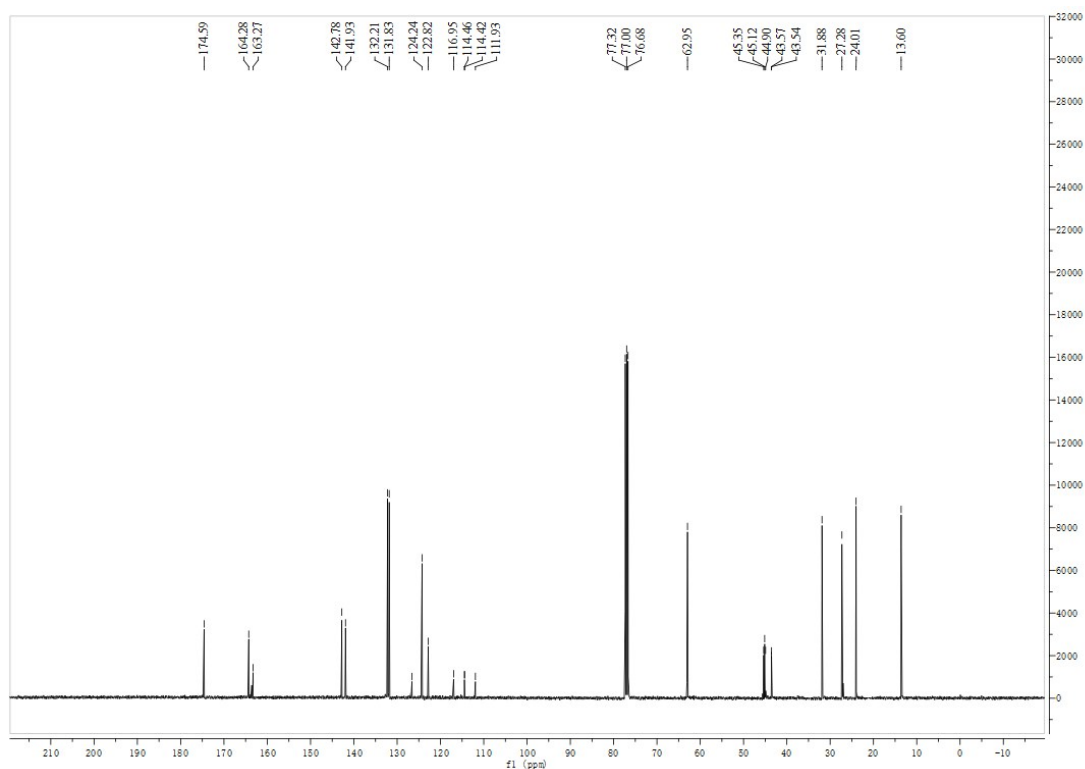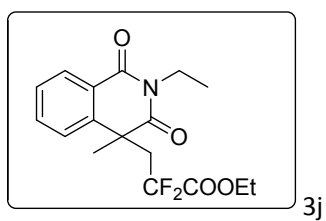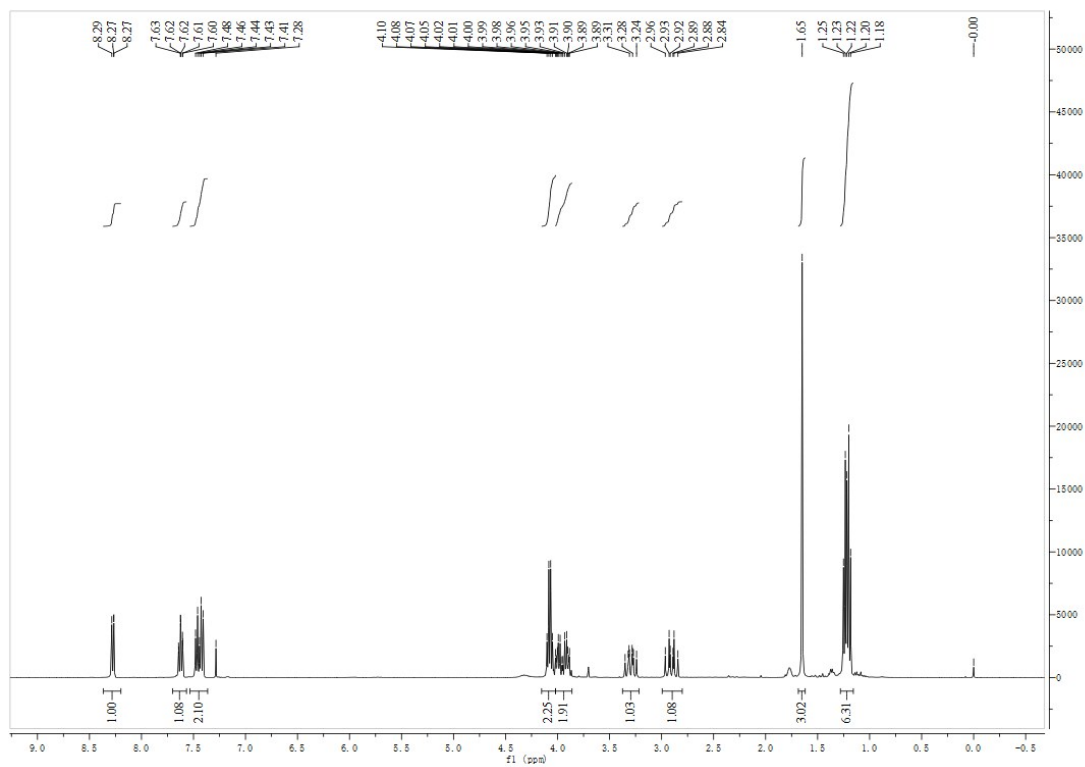

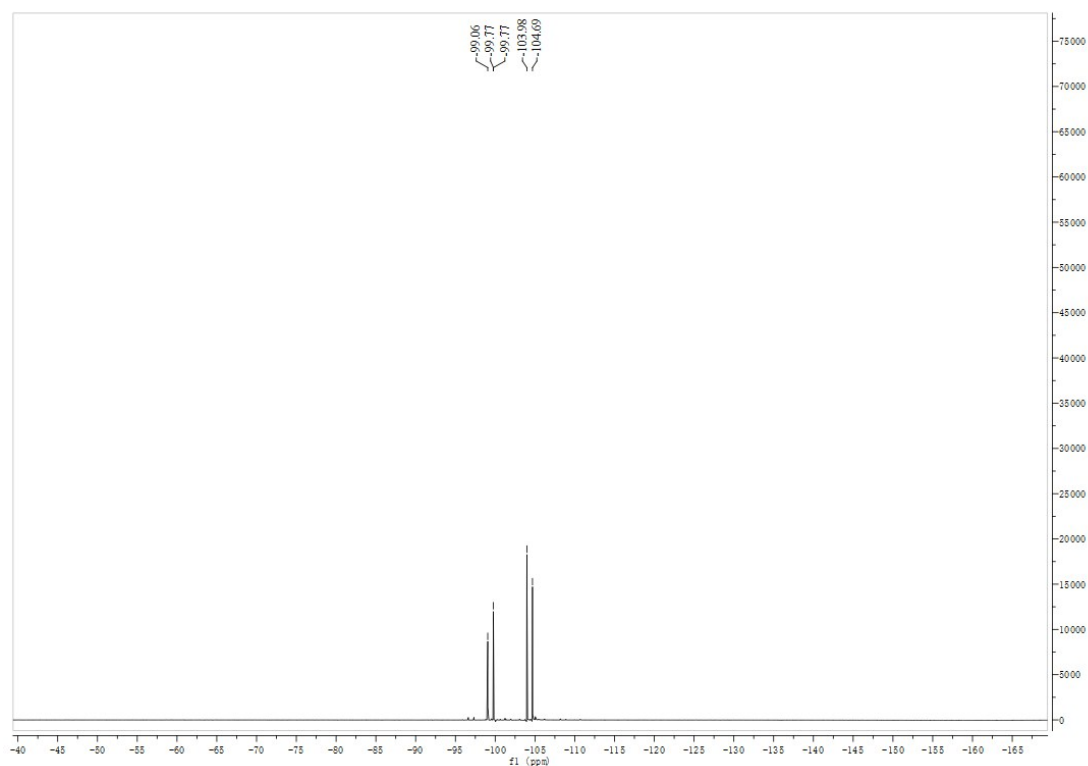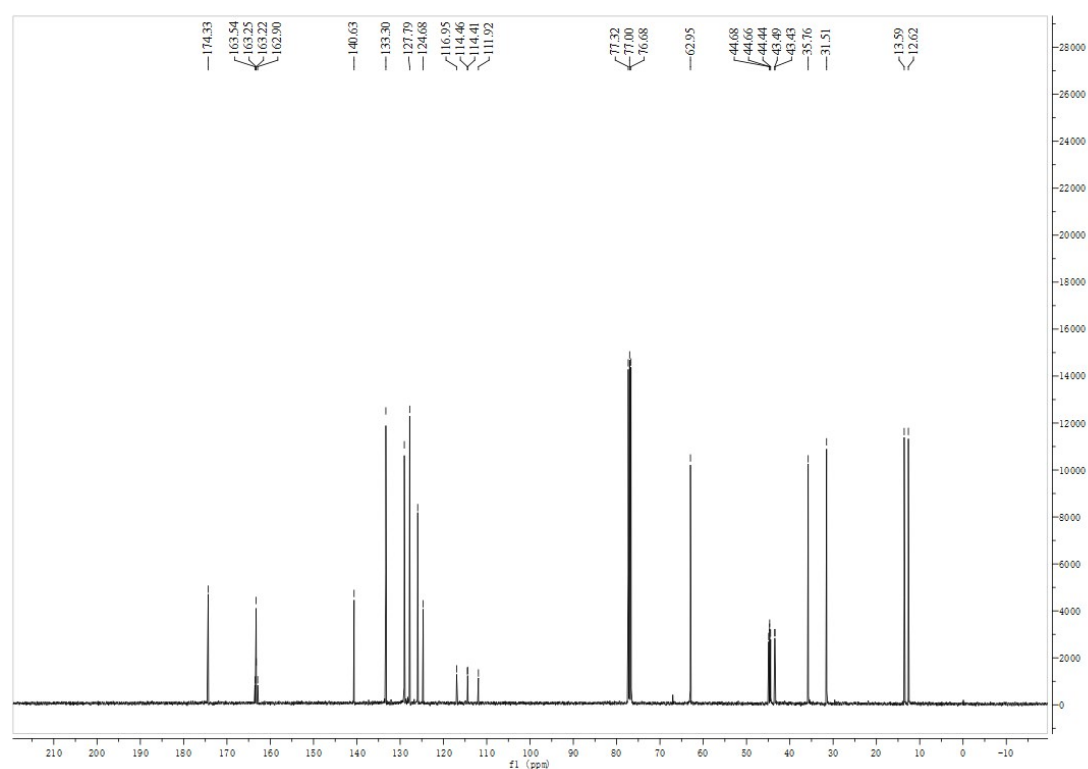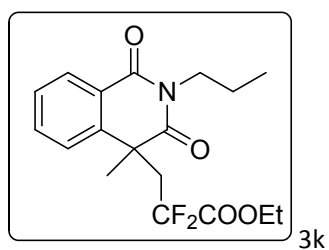

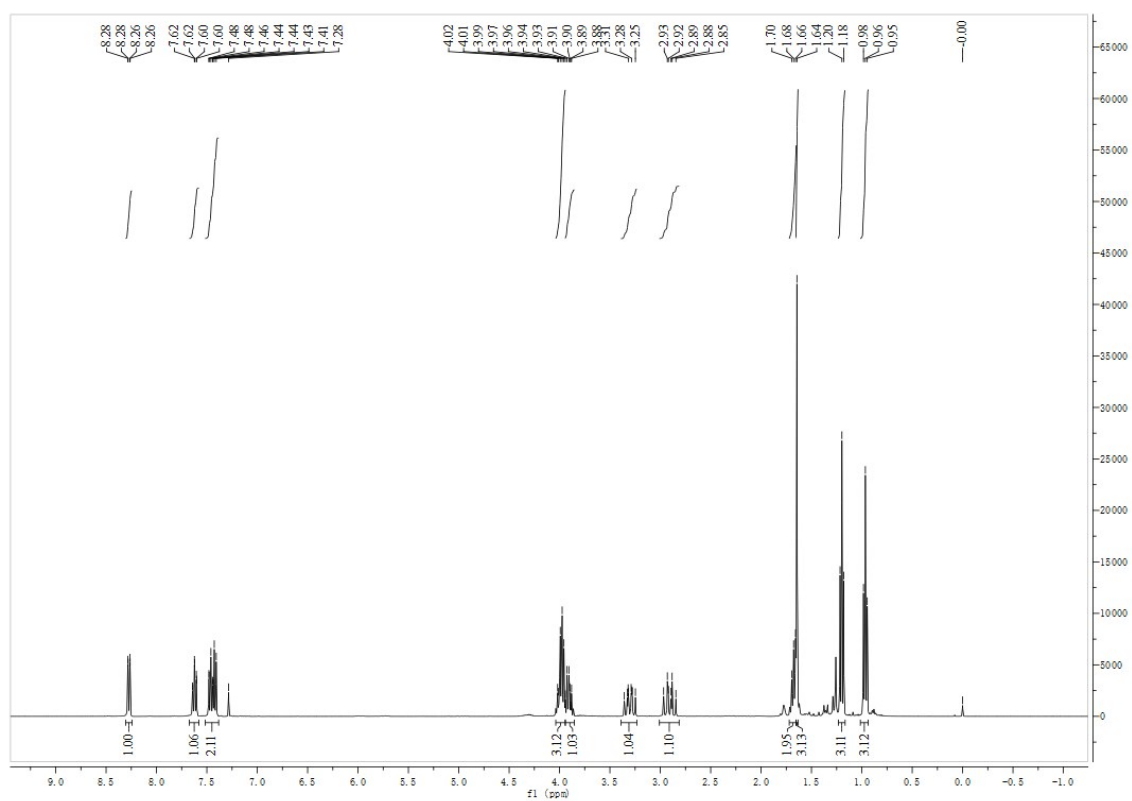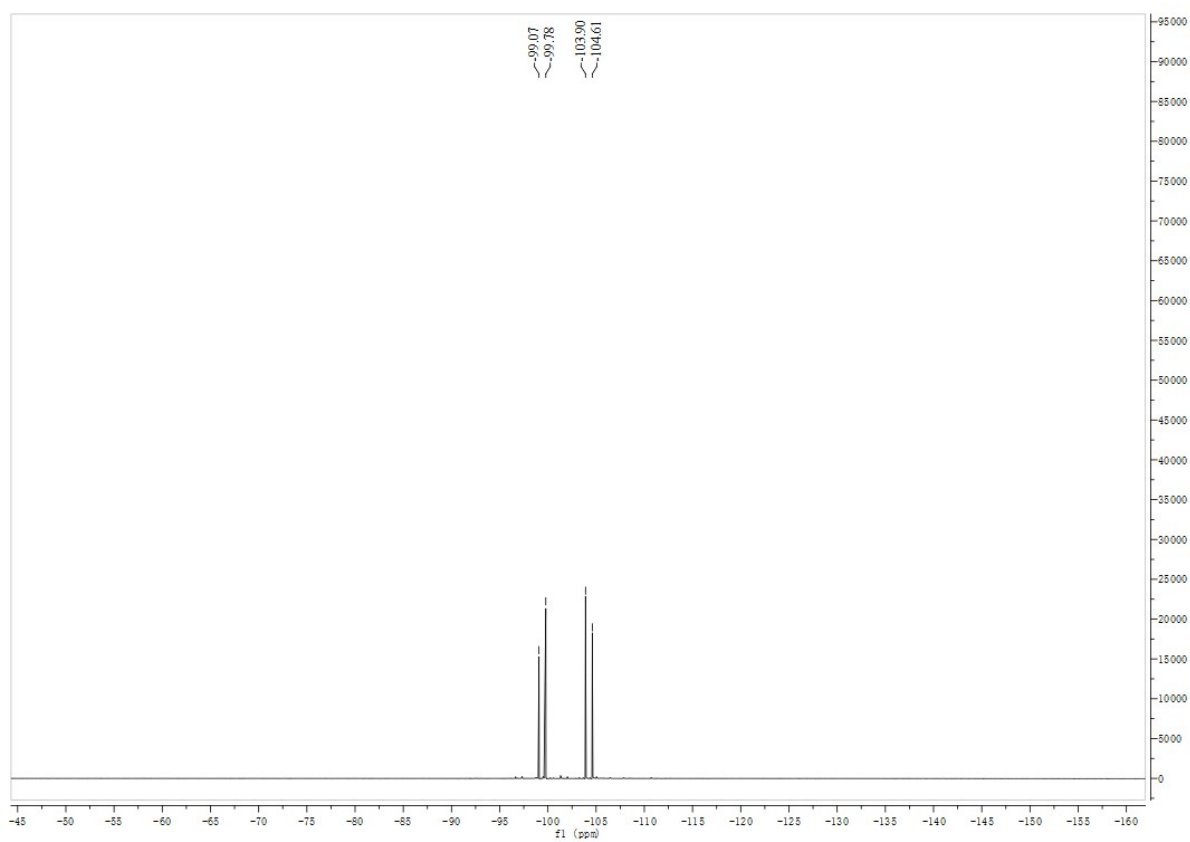

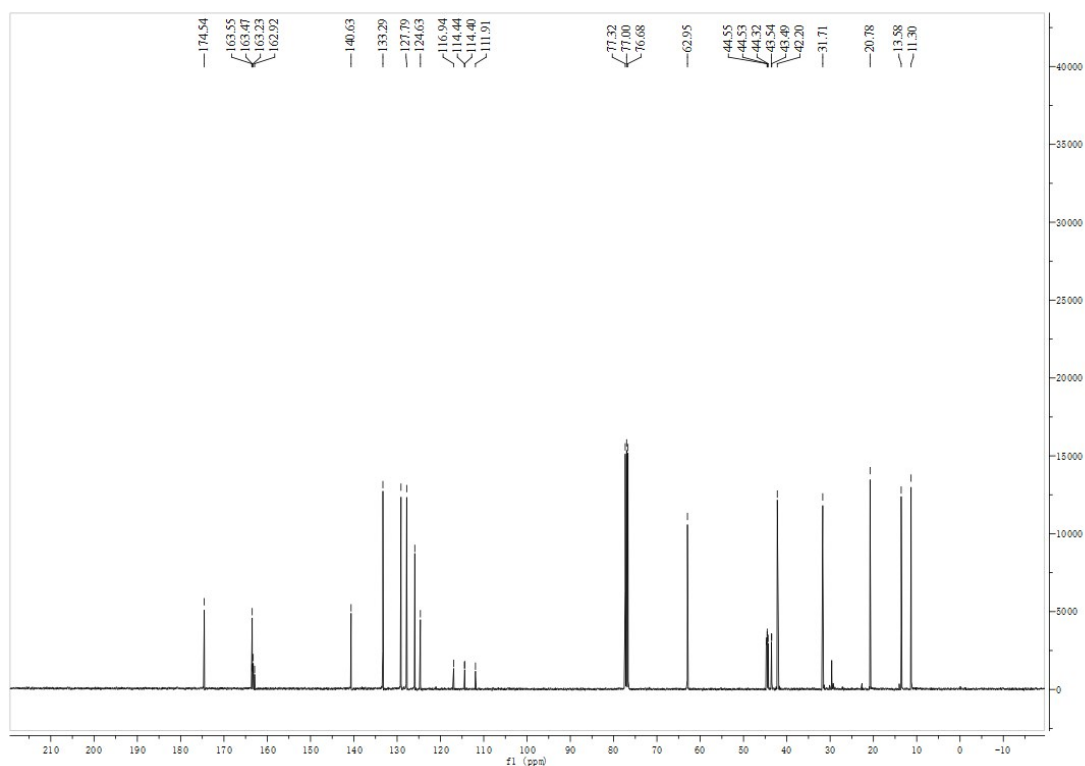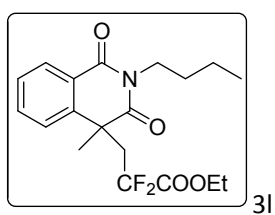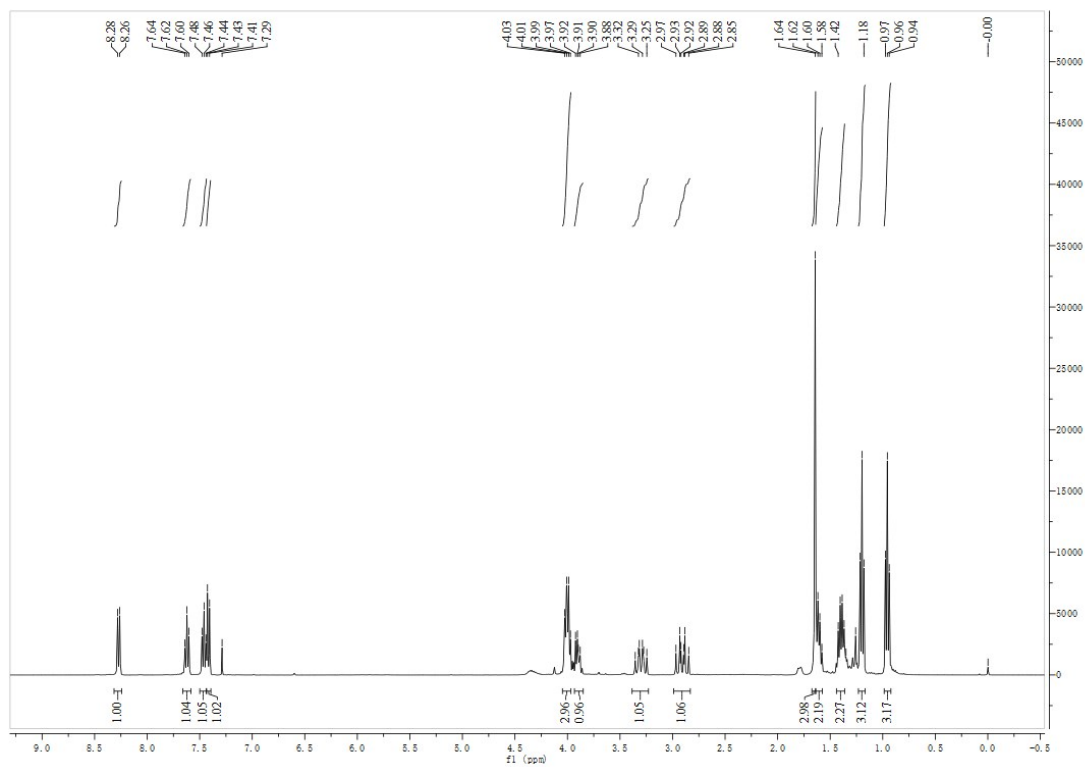

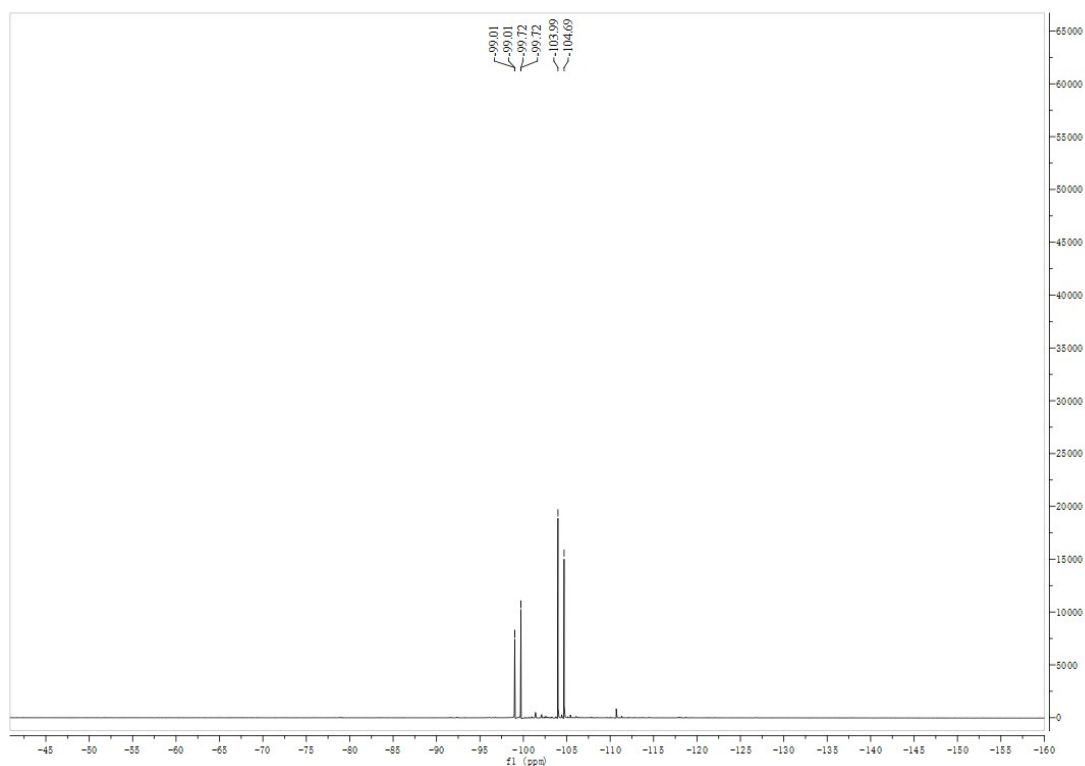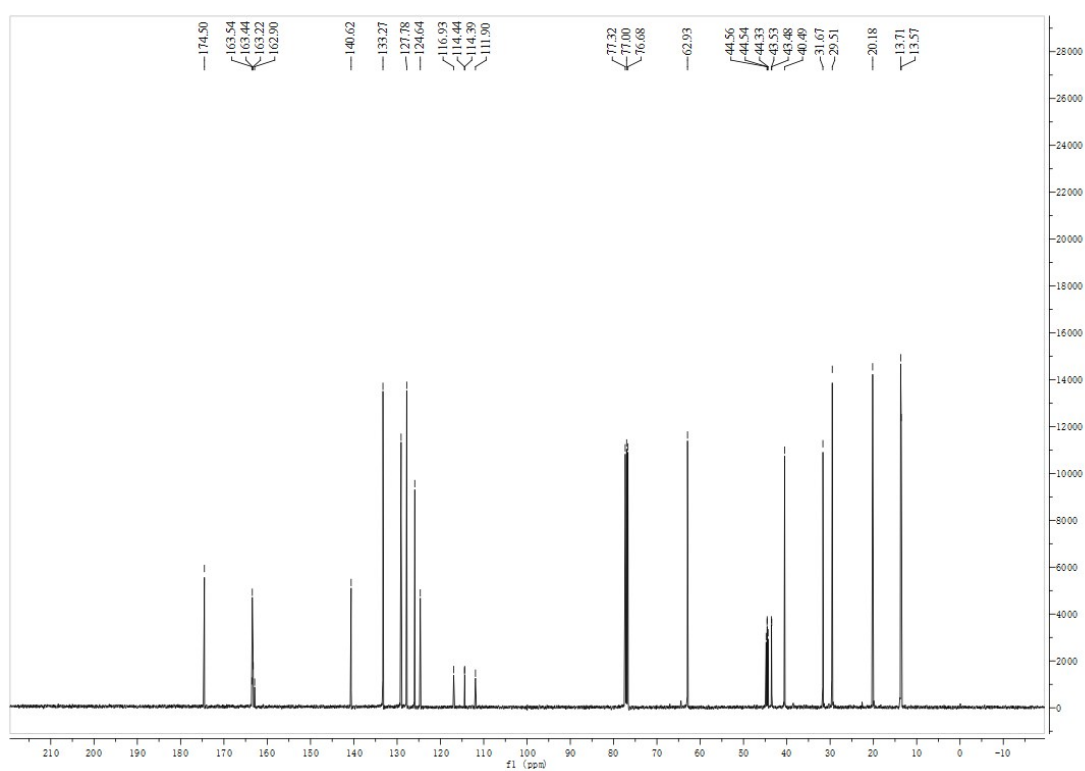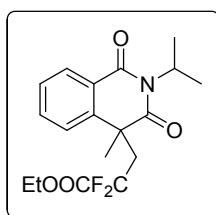

3m

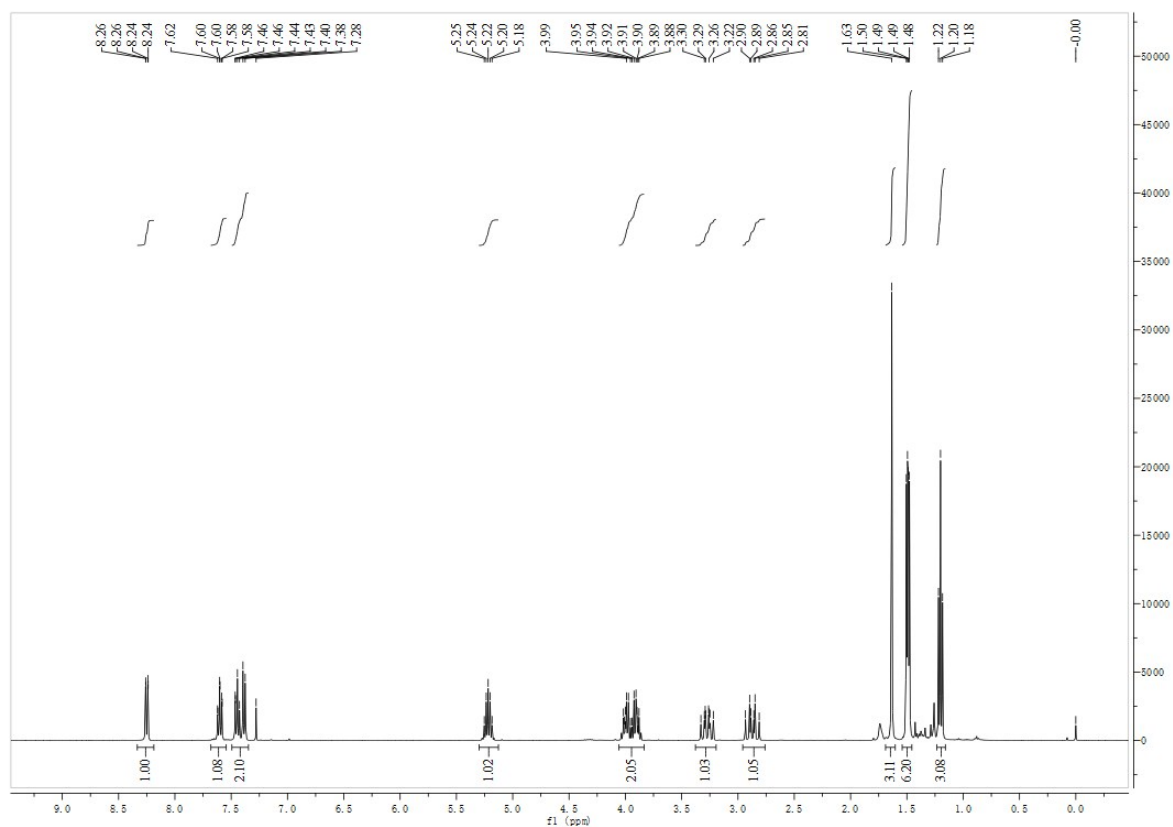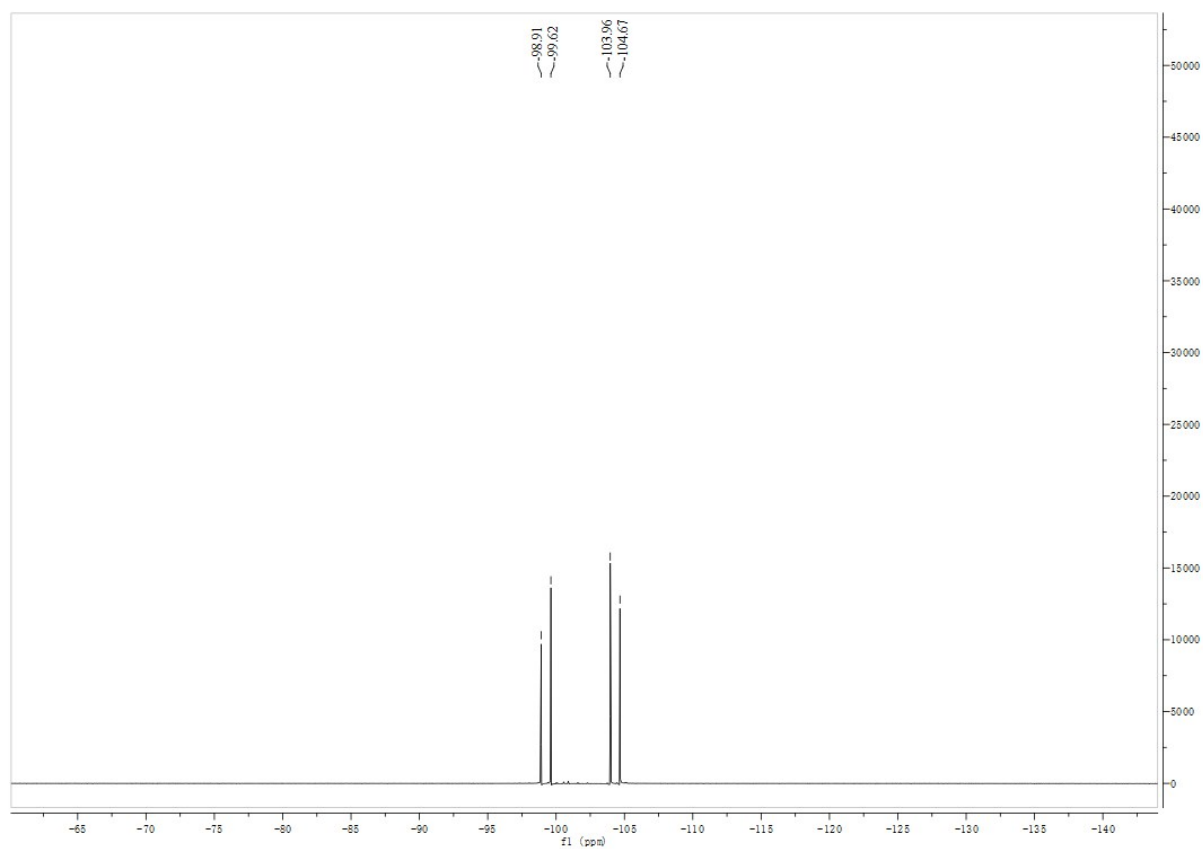

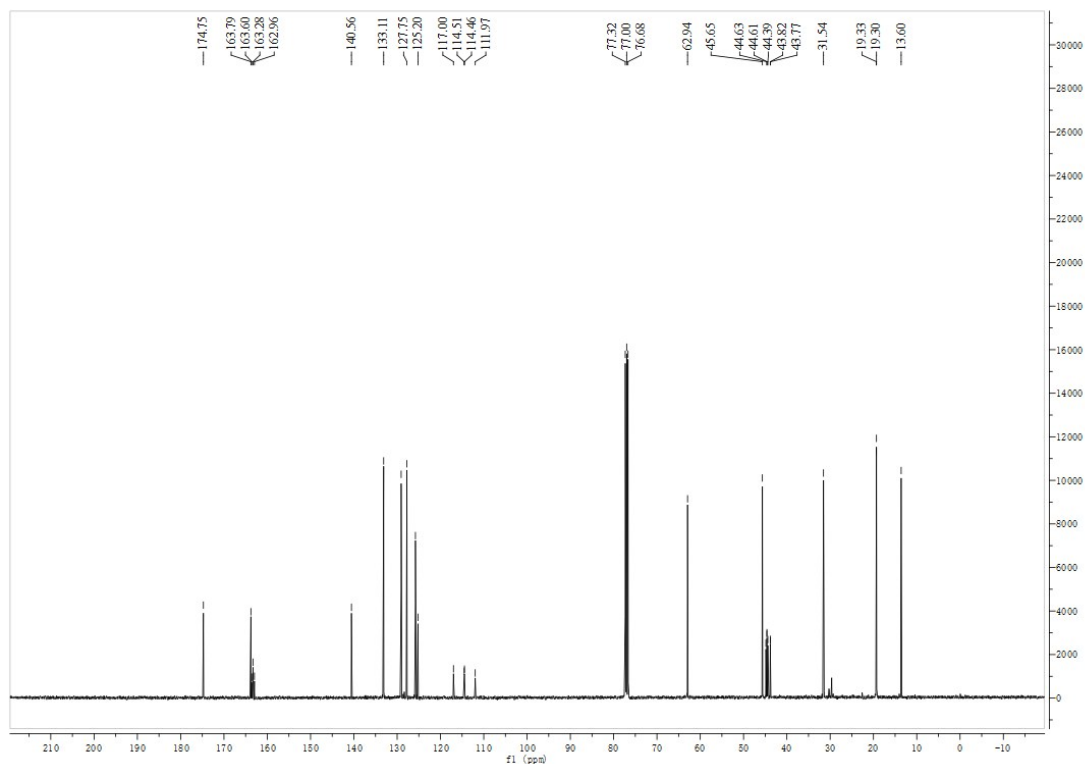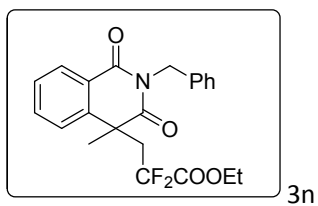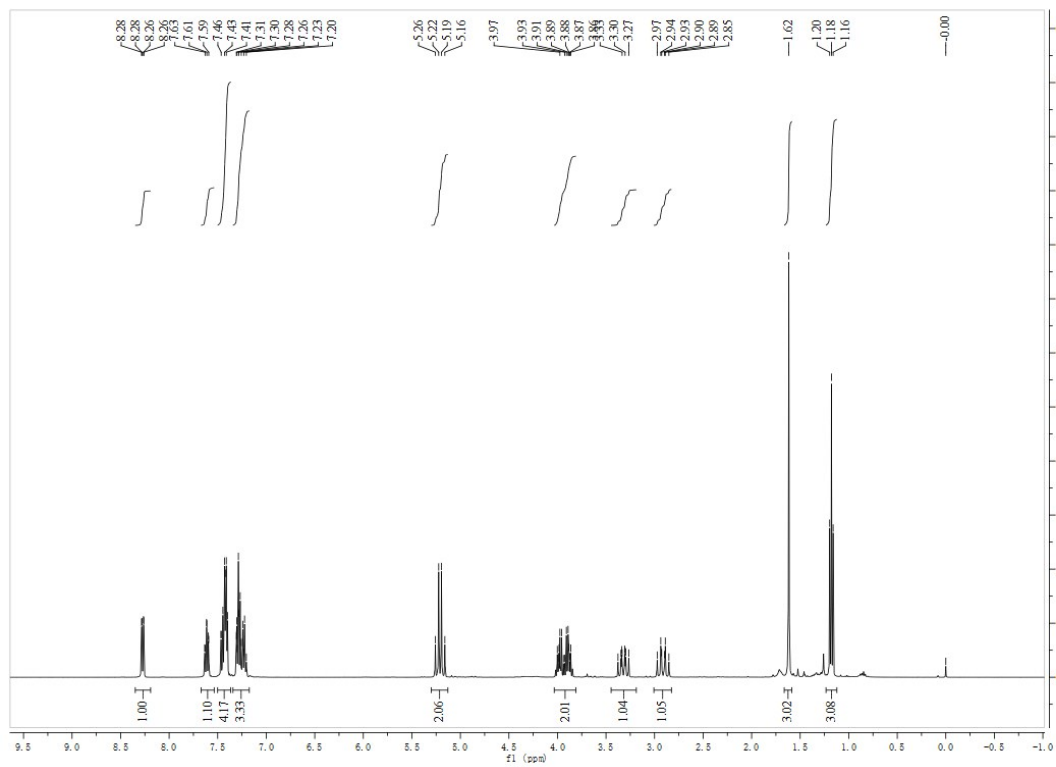

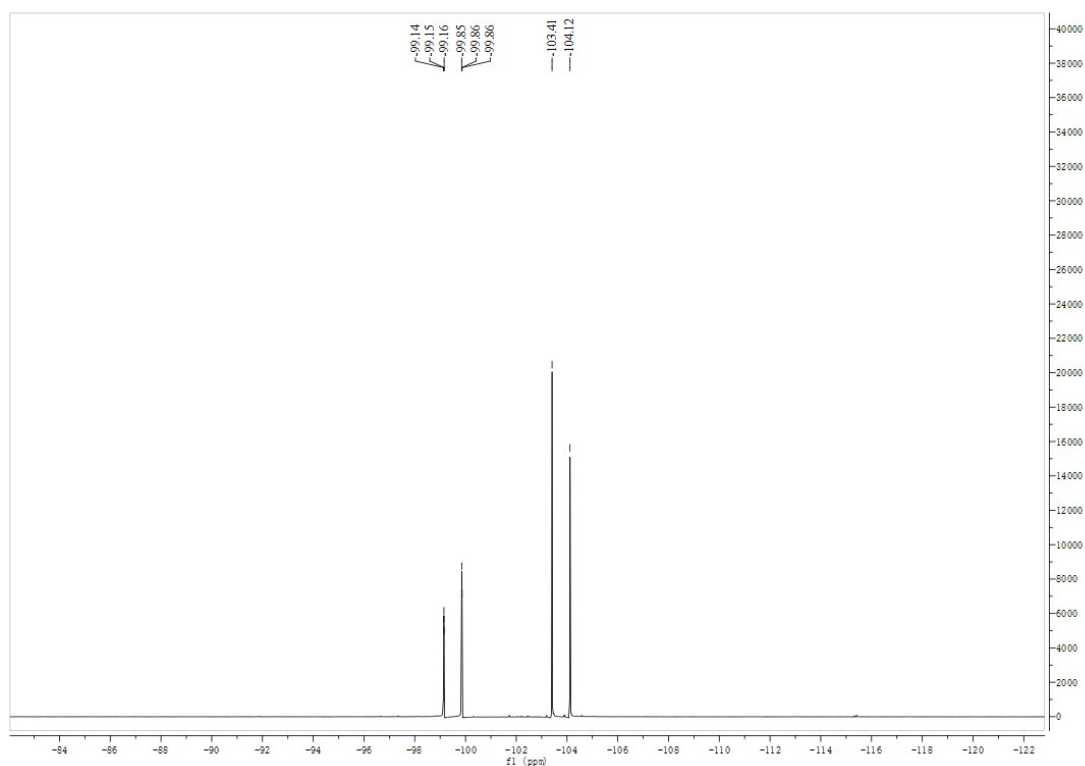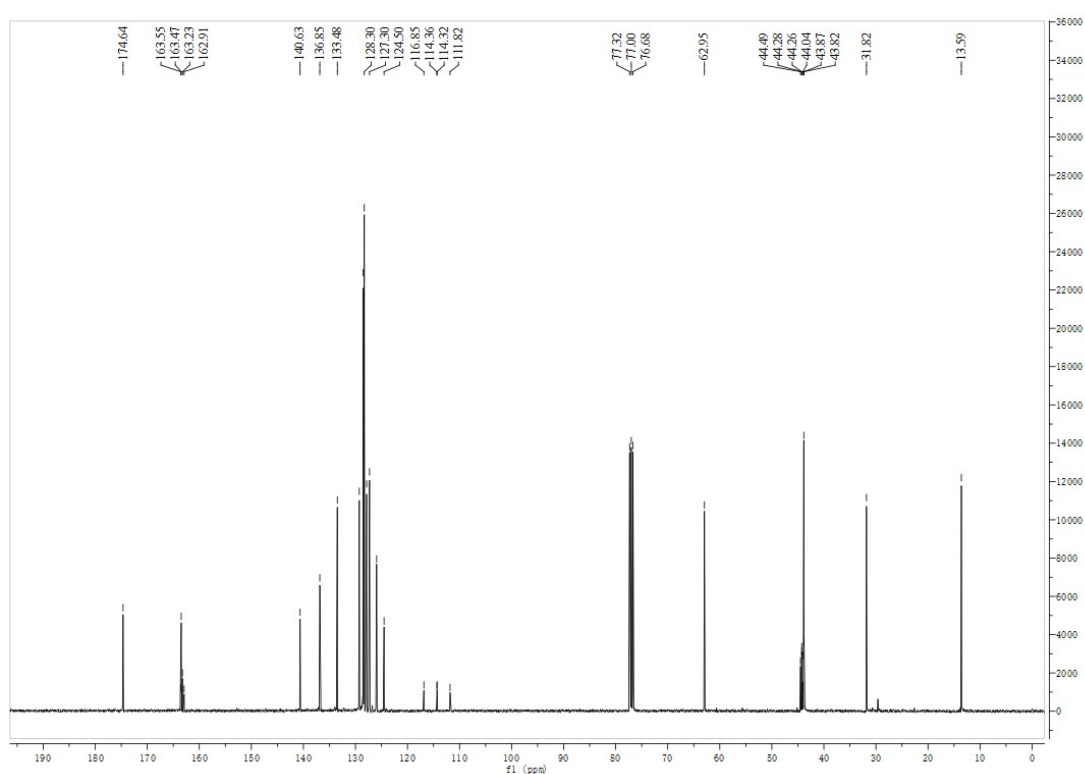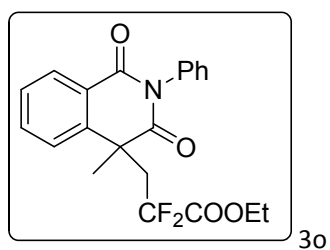

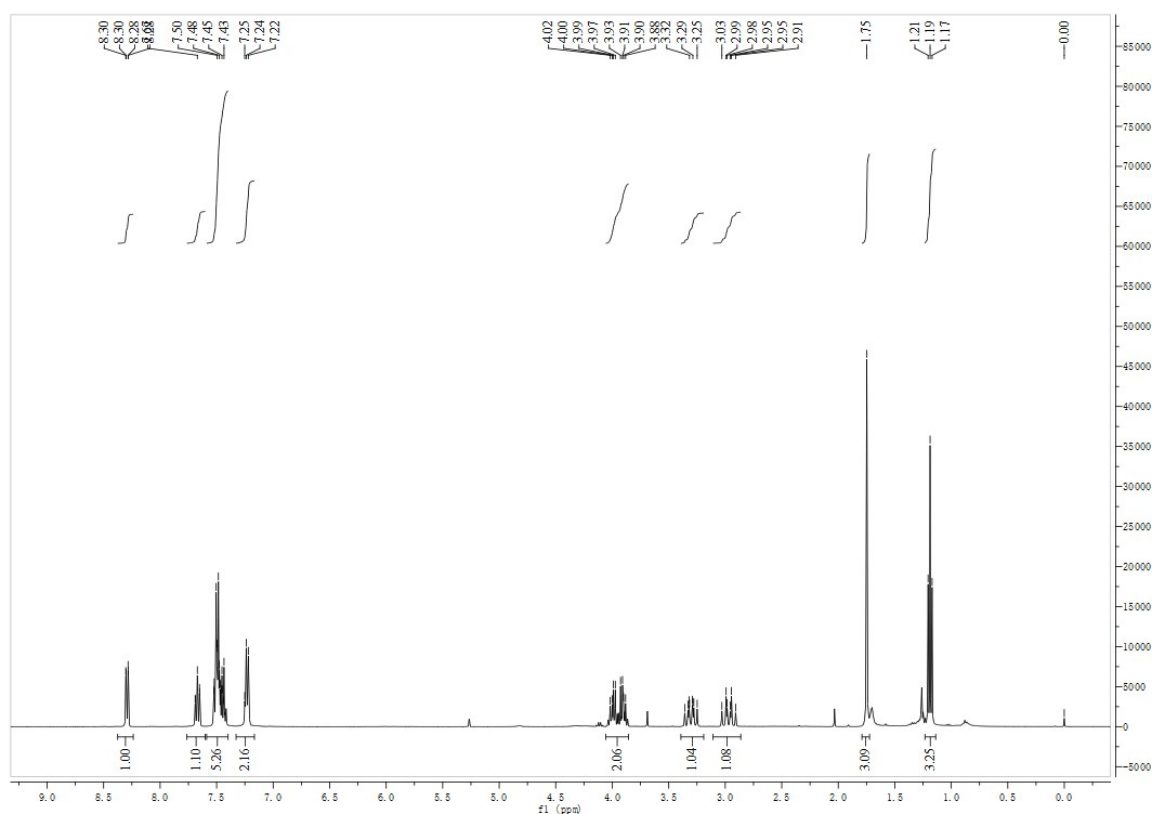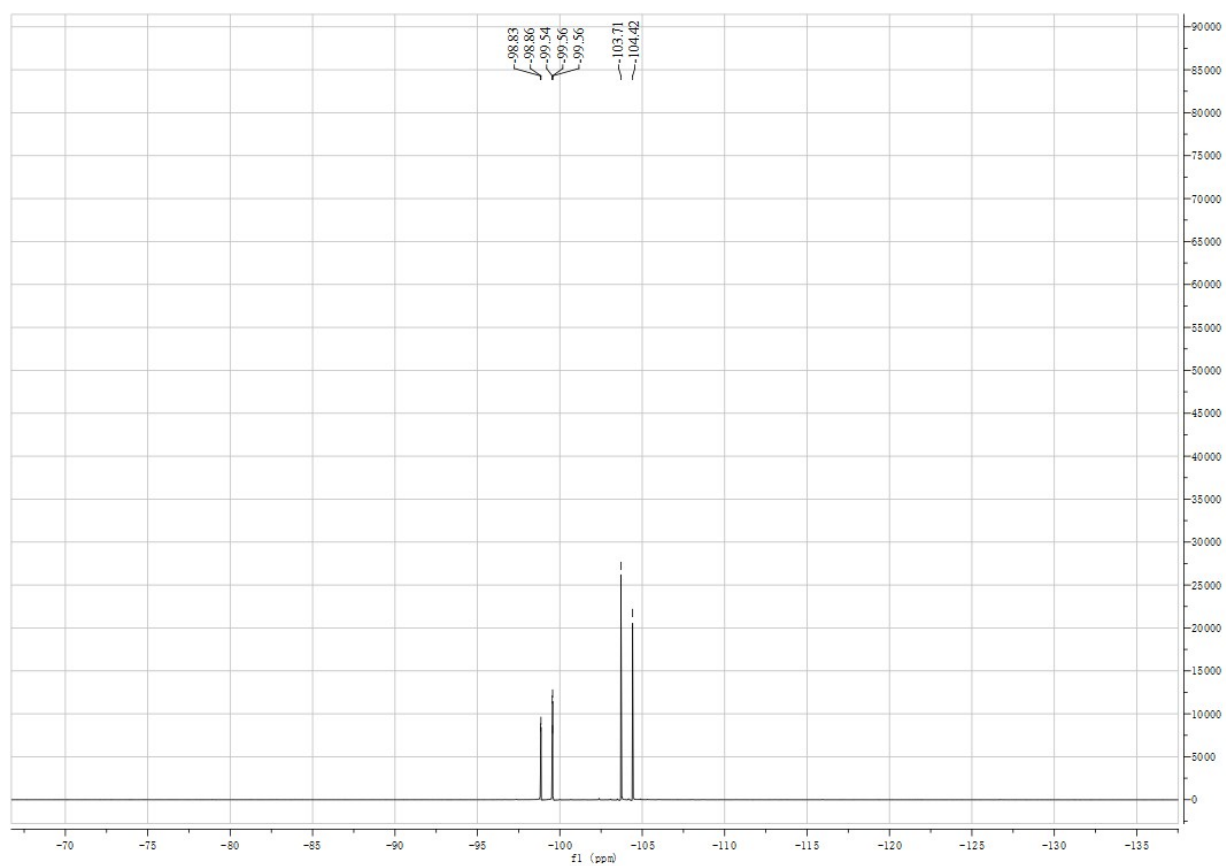

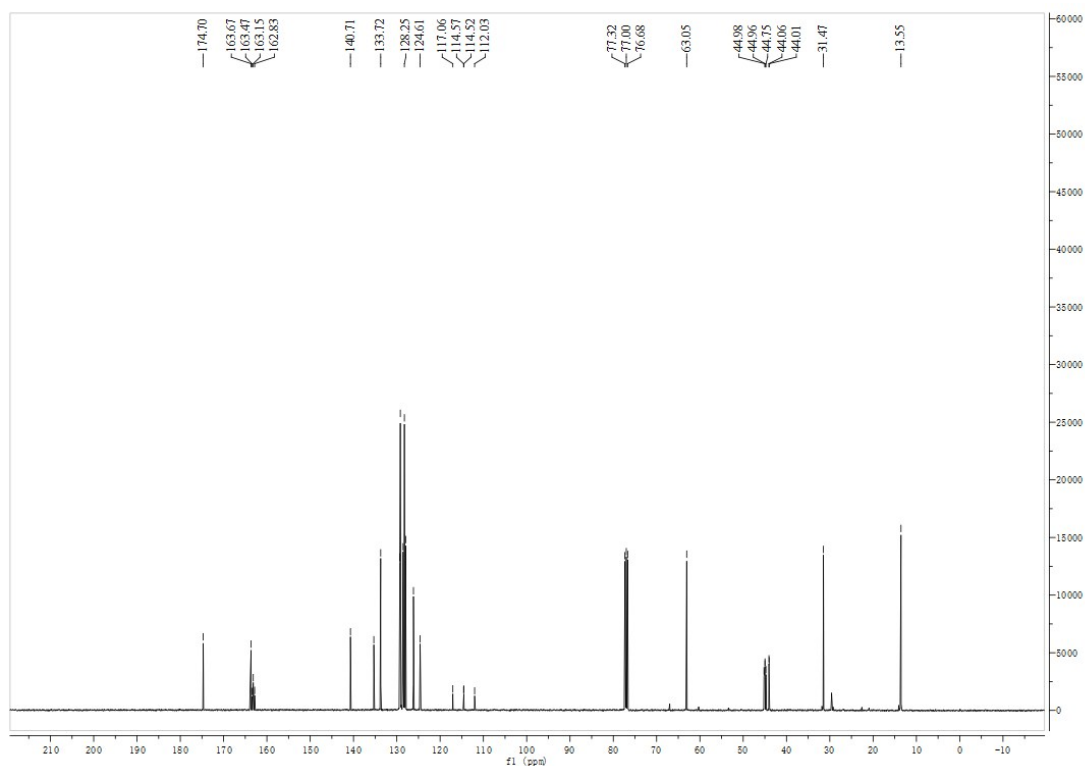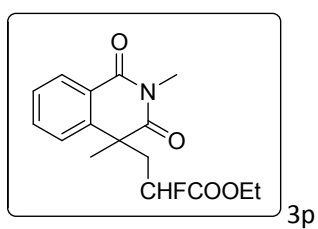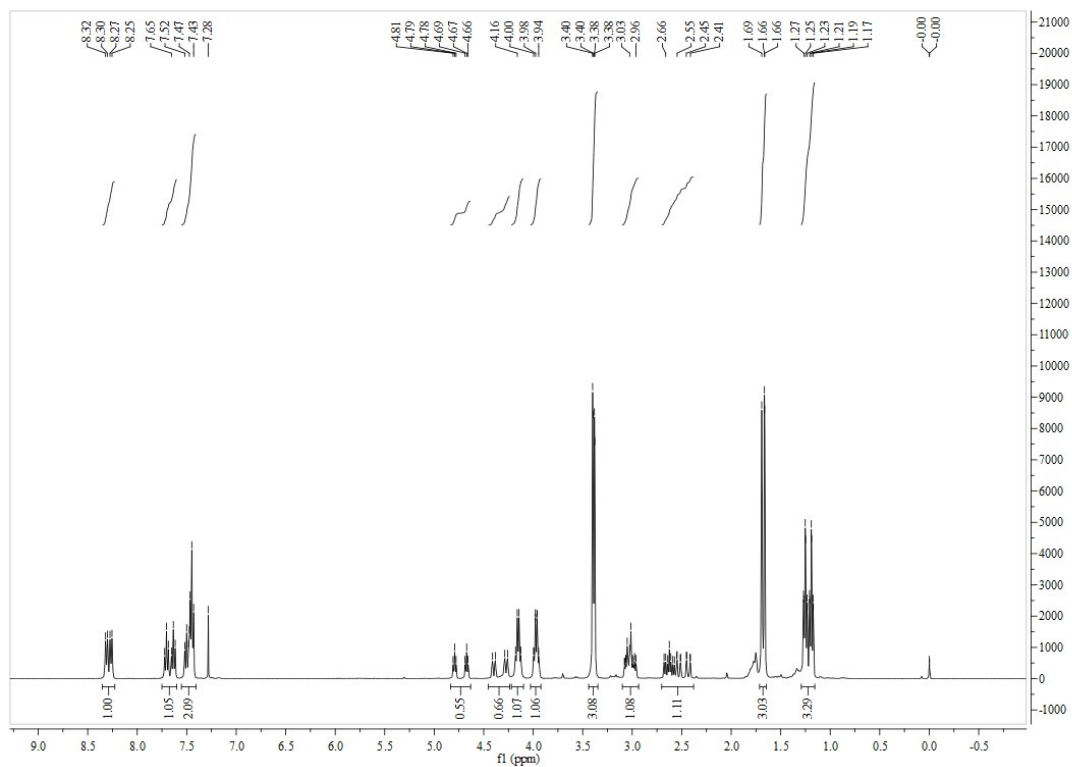

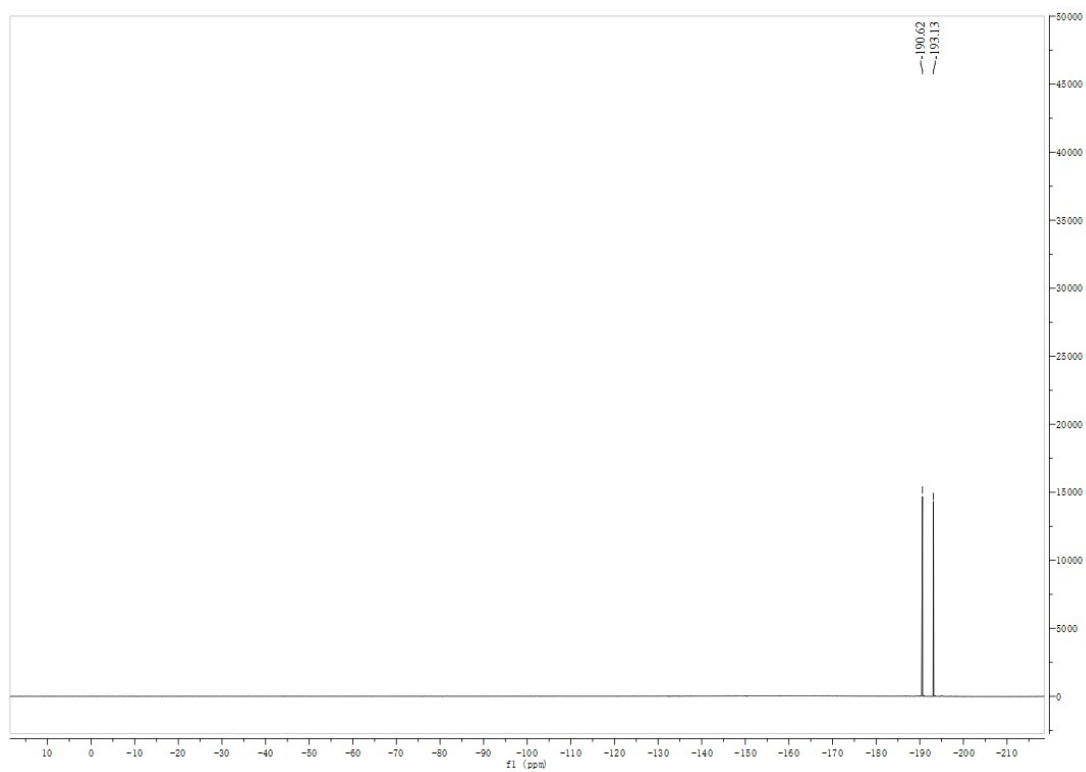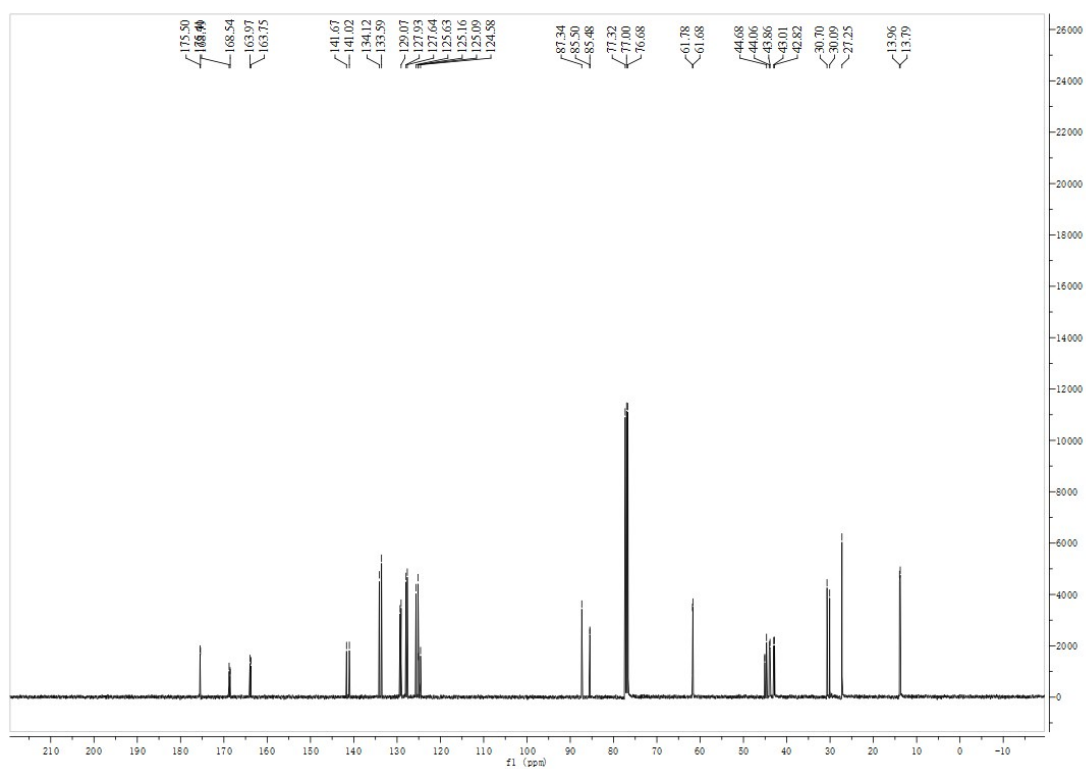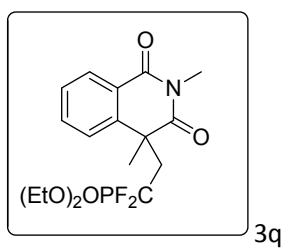

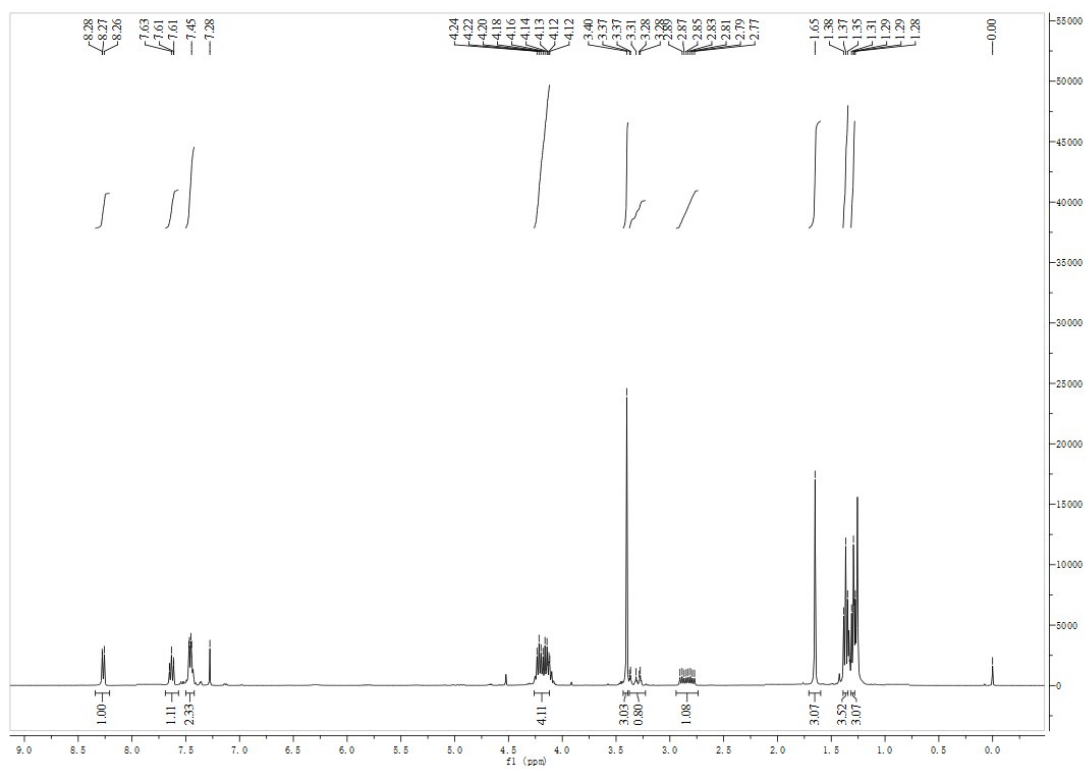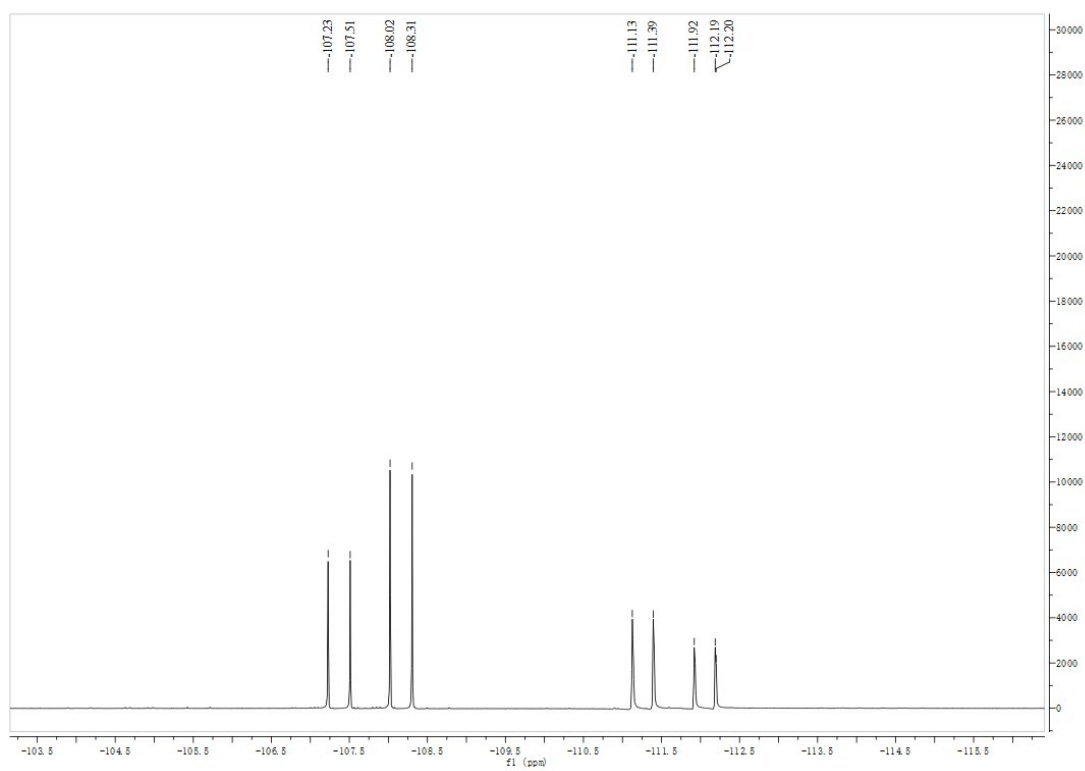

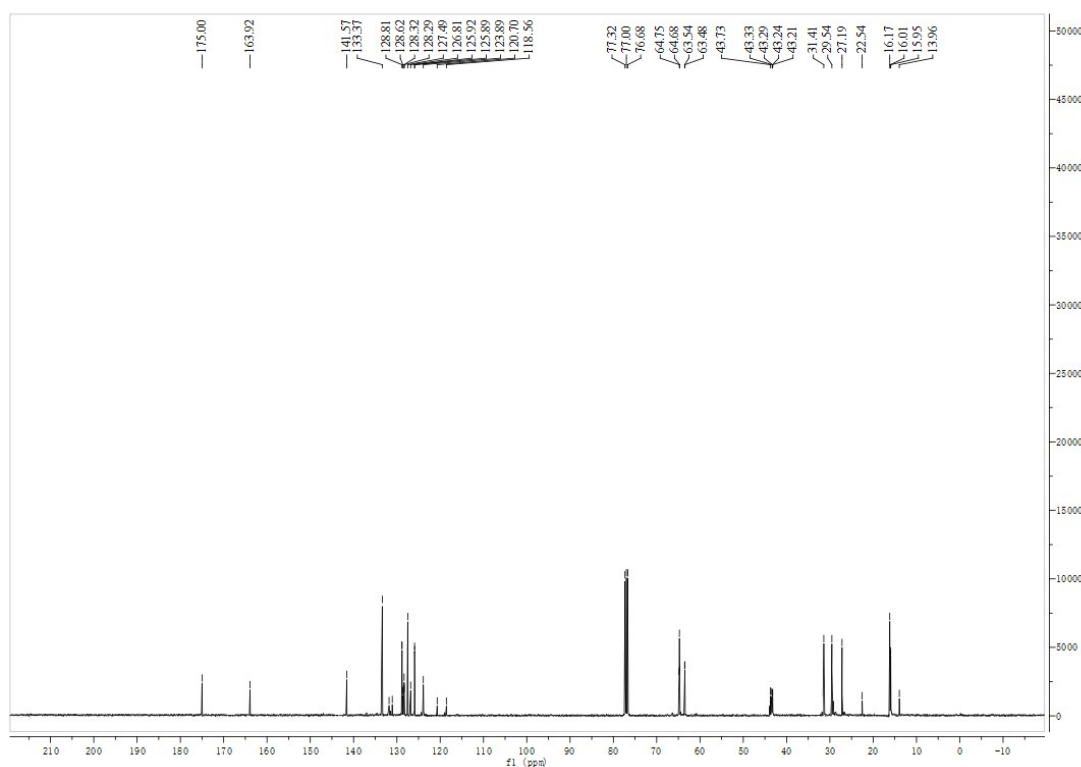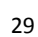

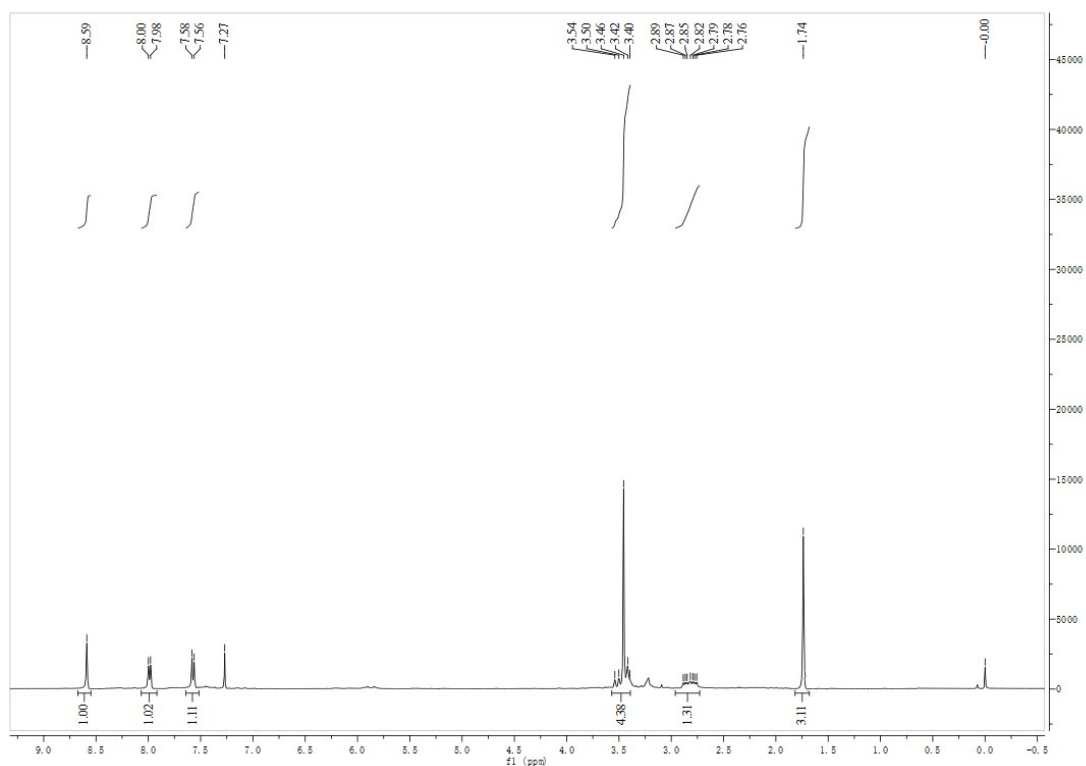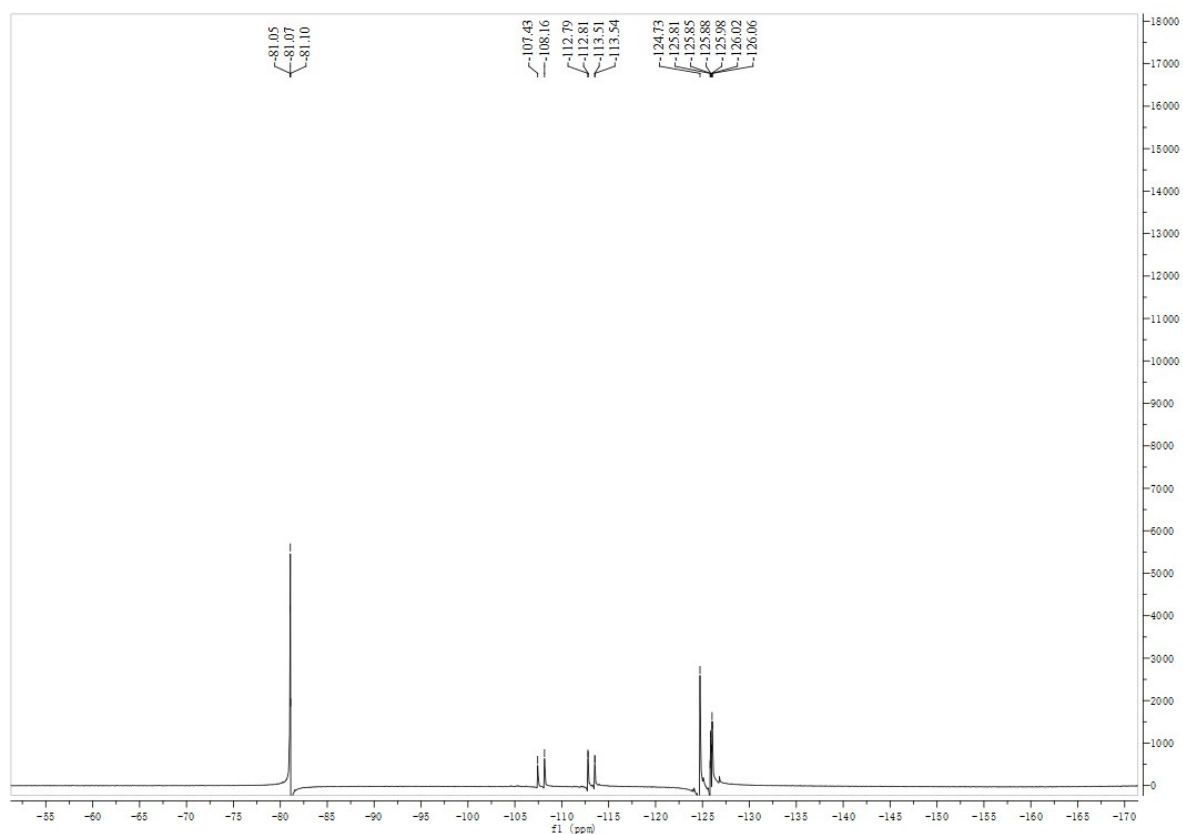

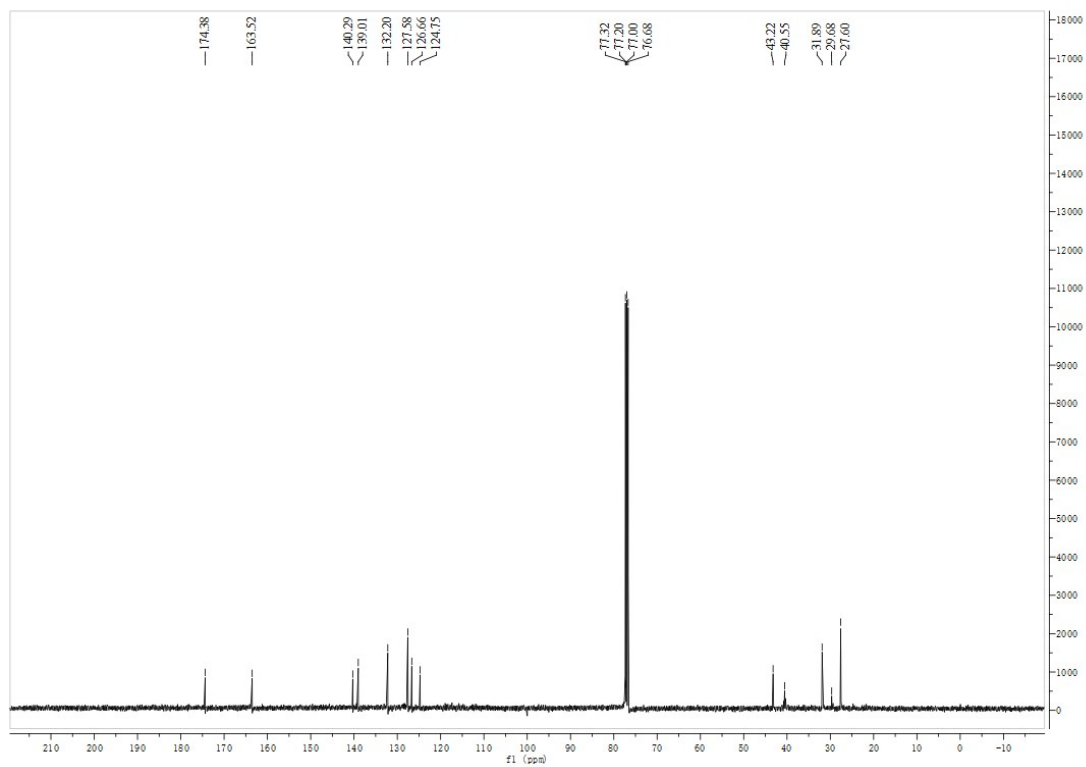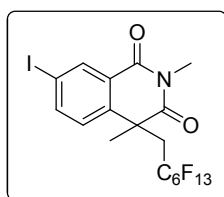

3s

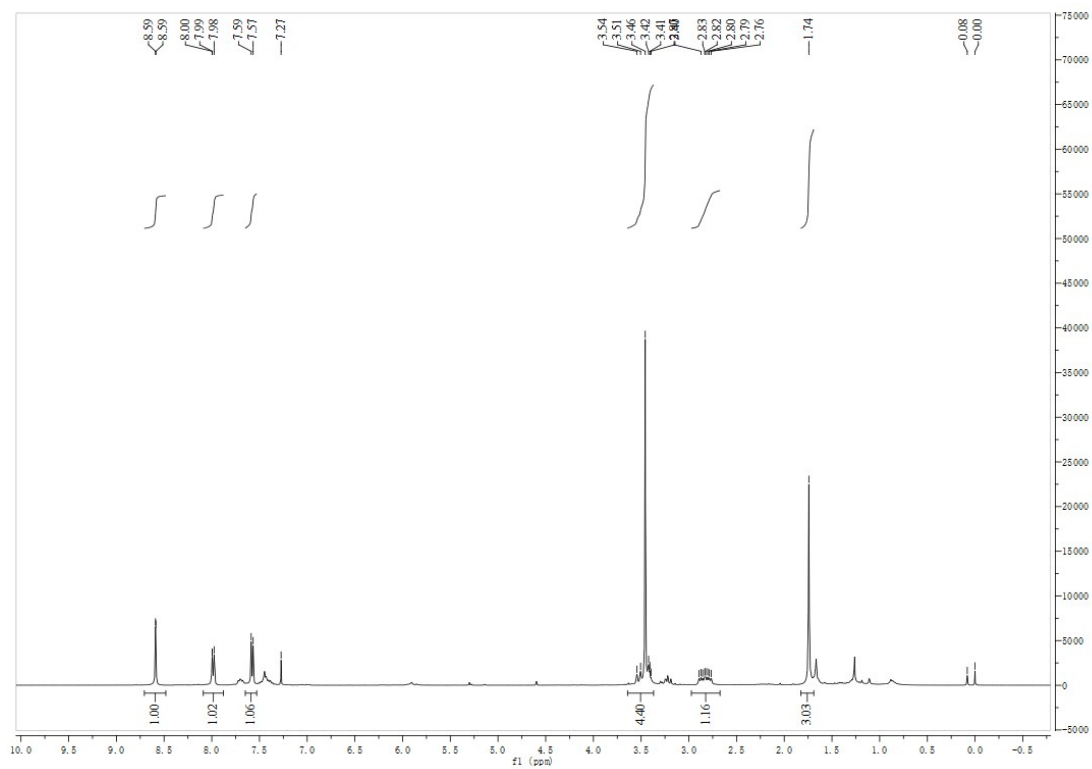

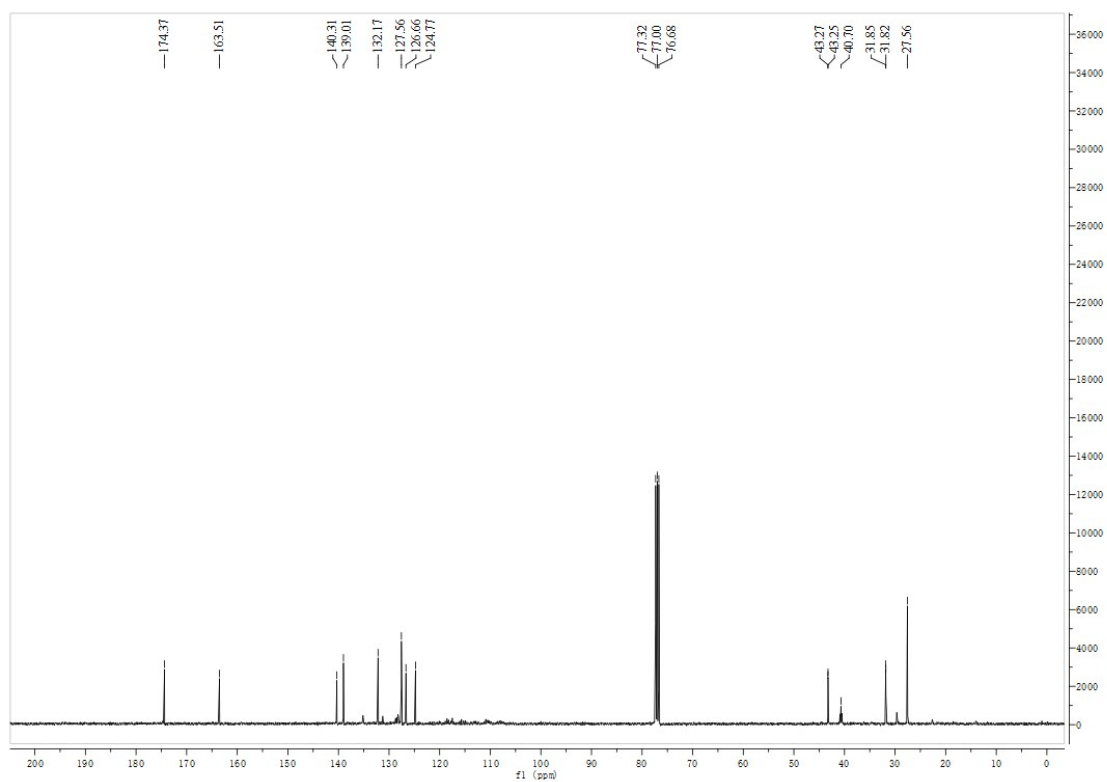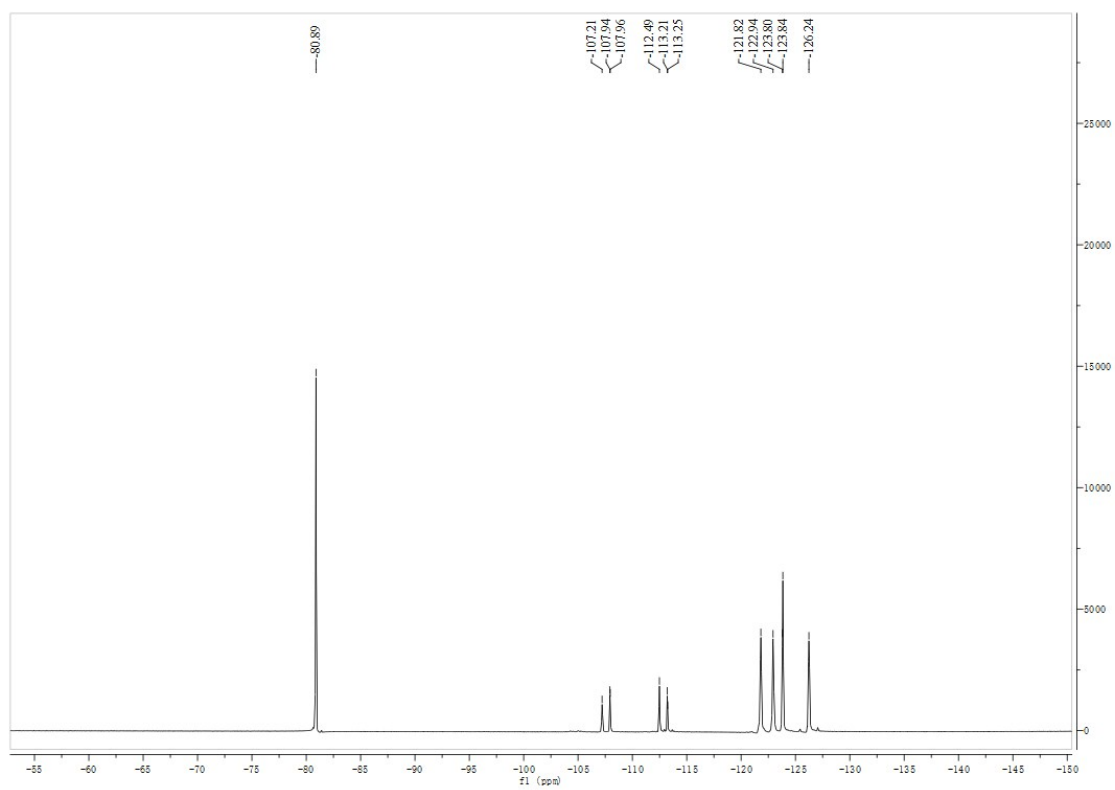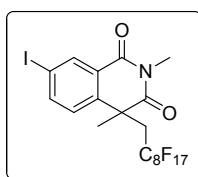

3t

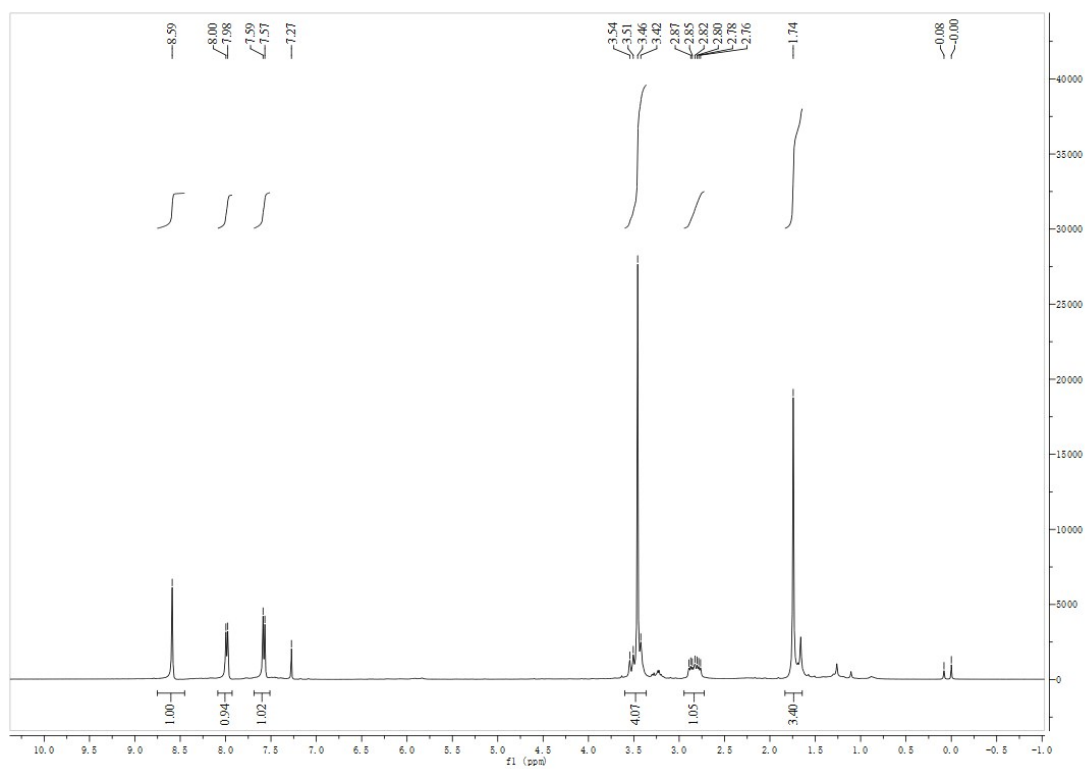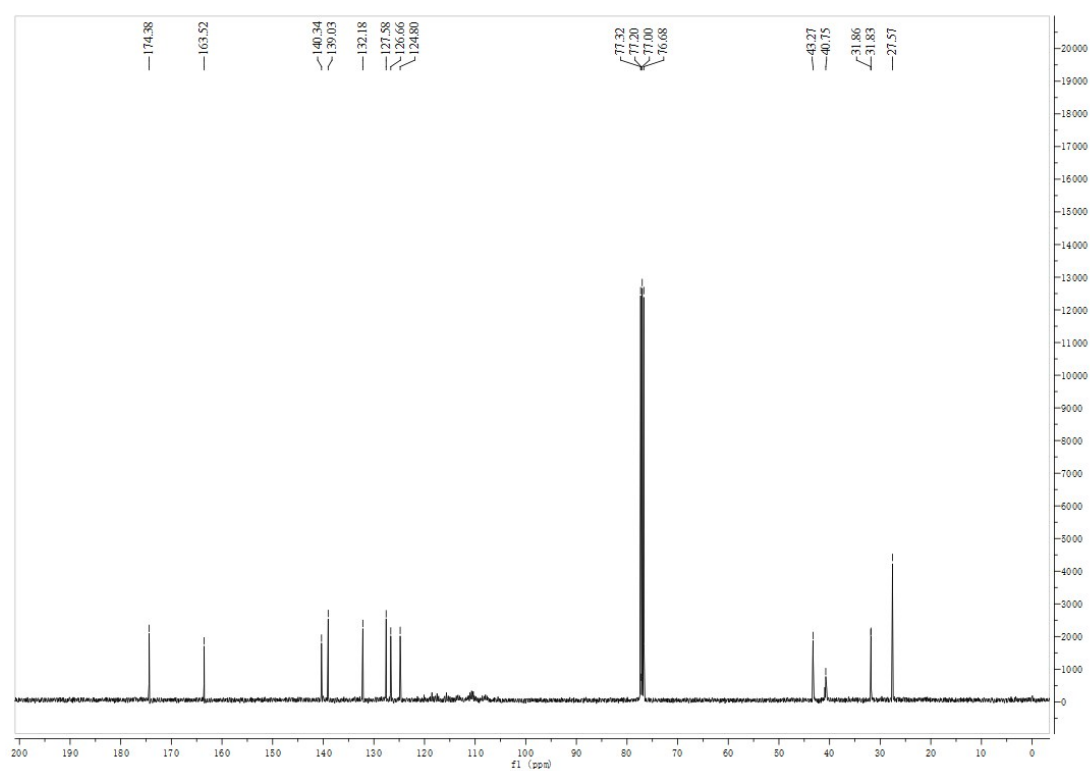

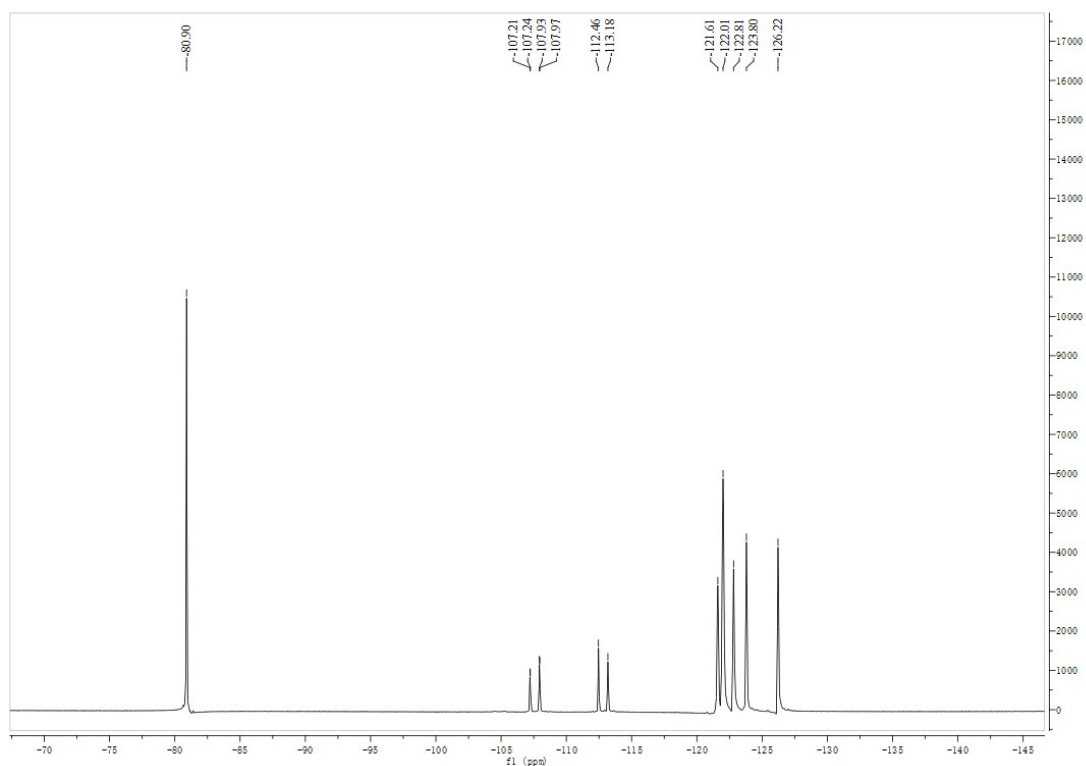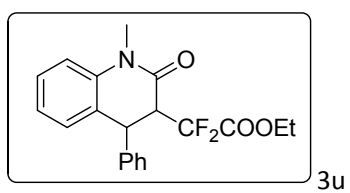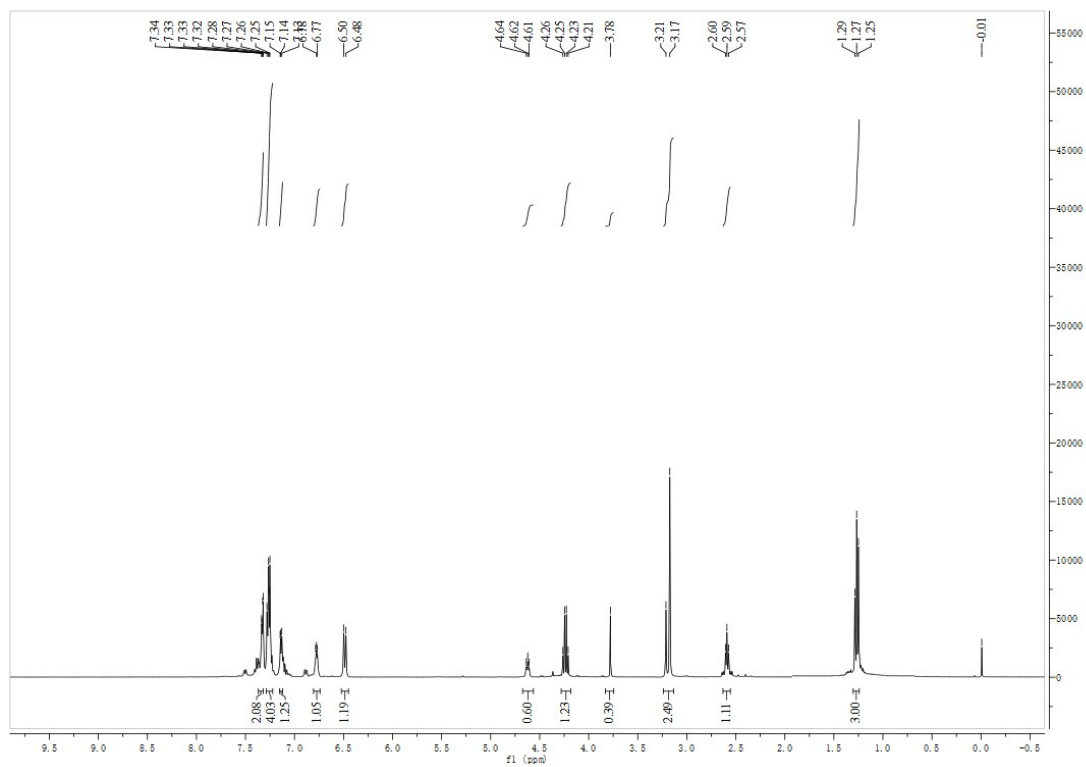

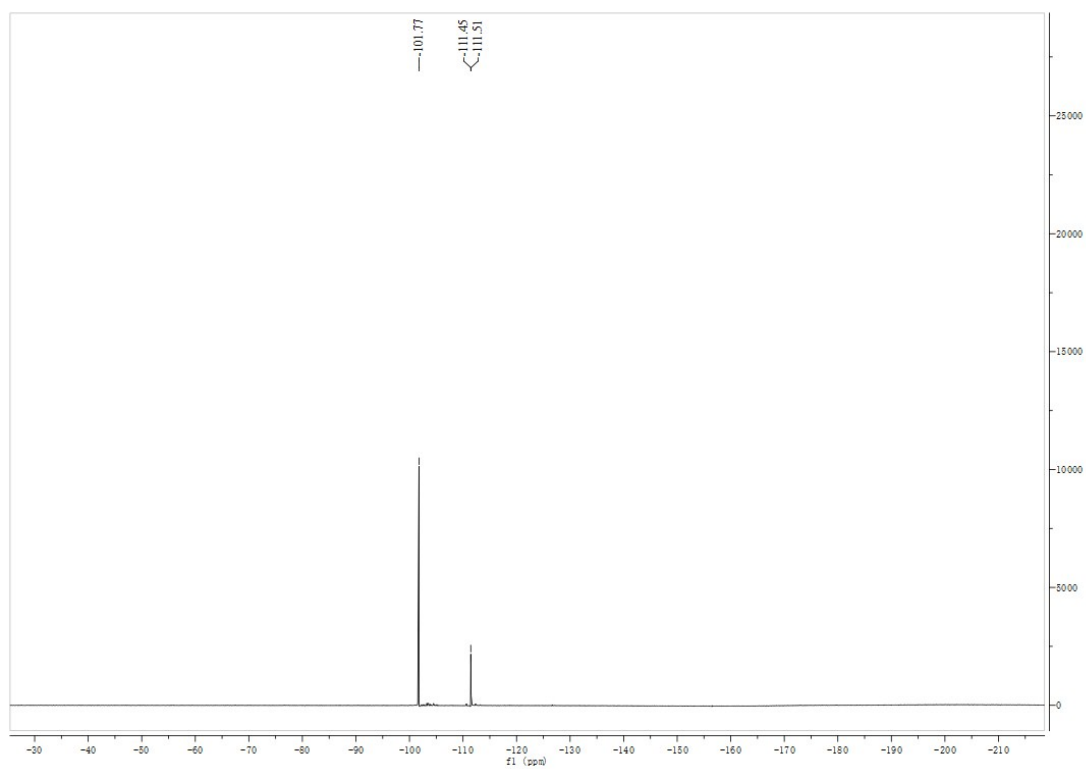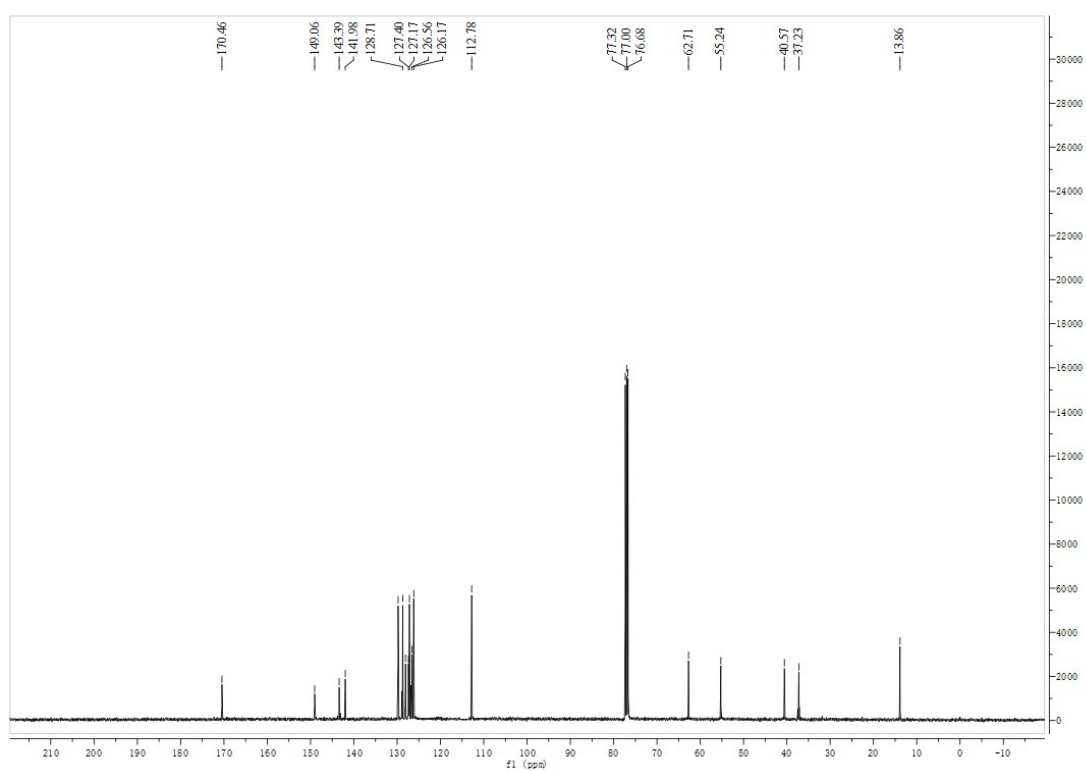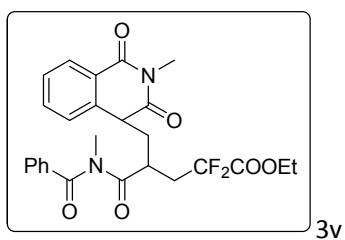

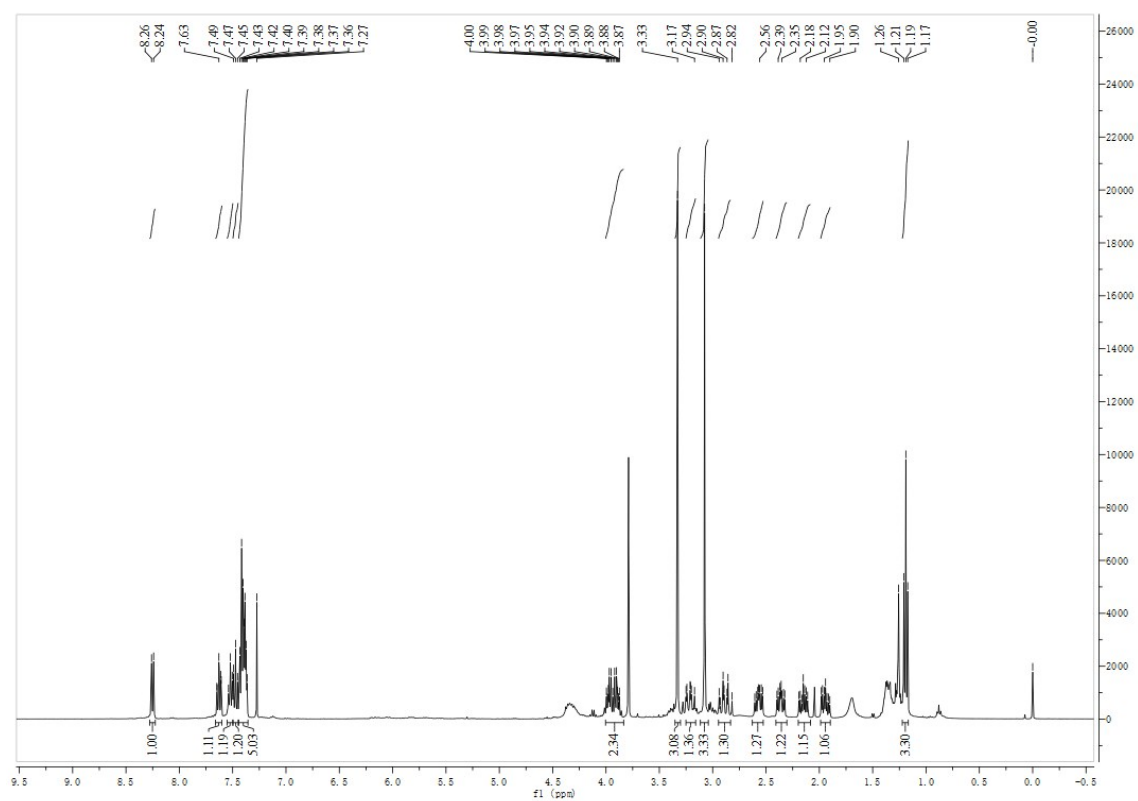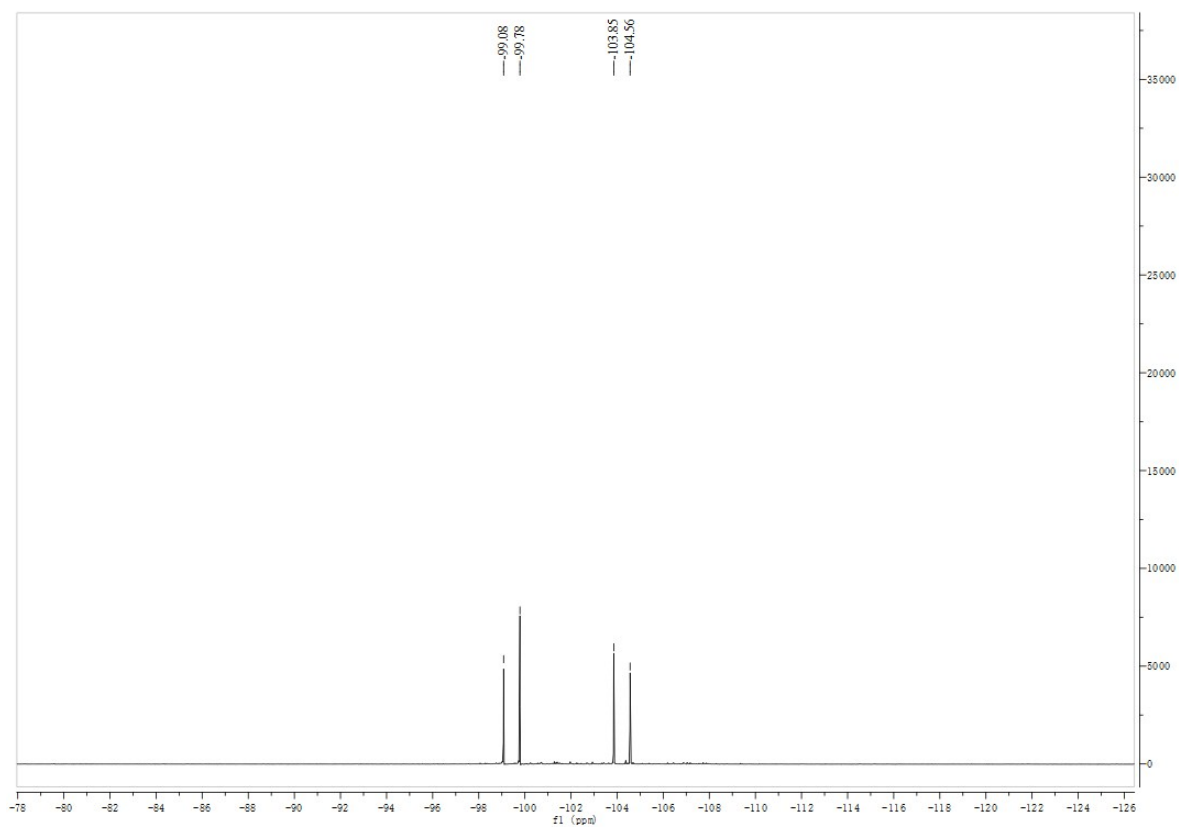

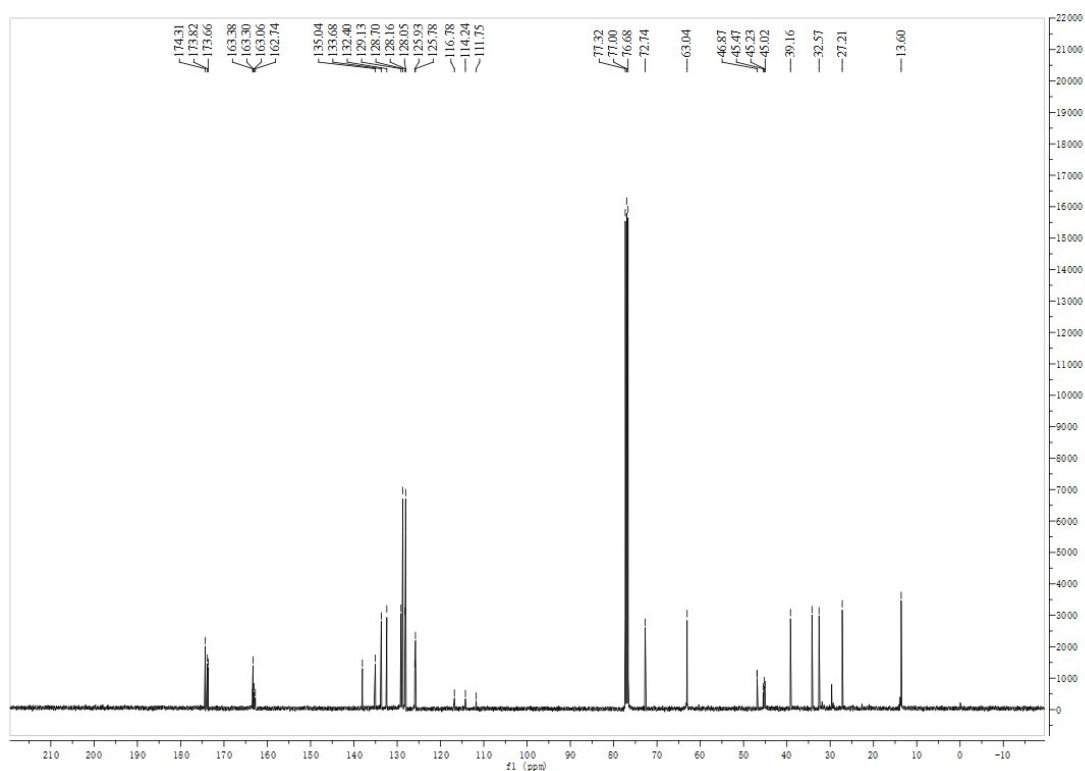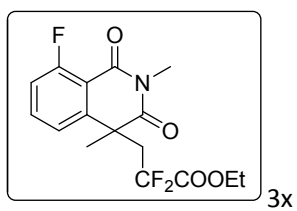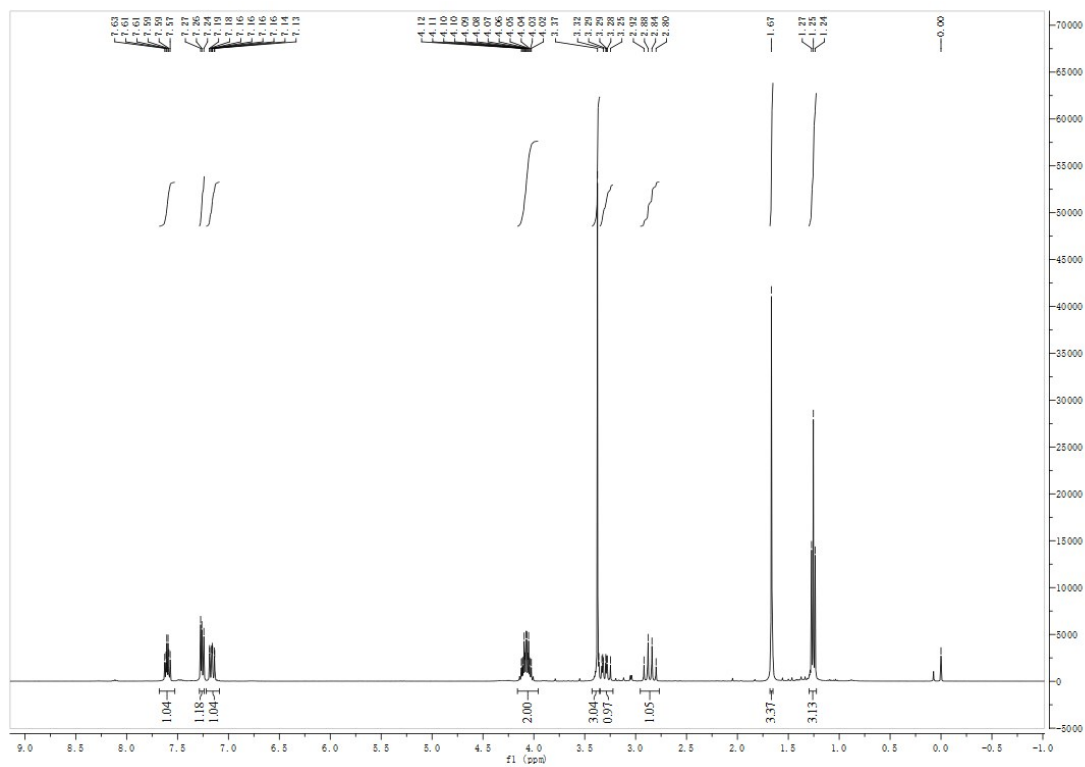

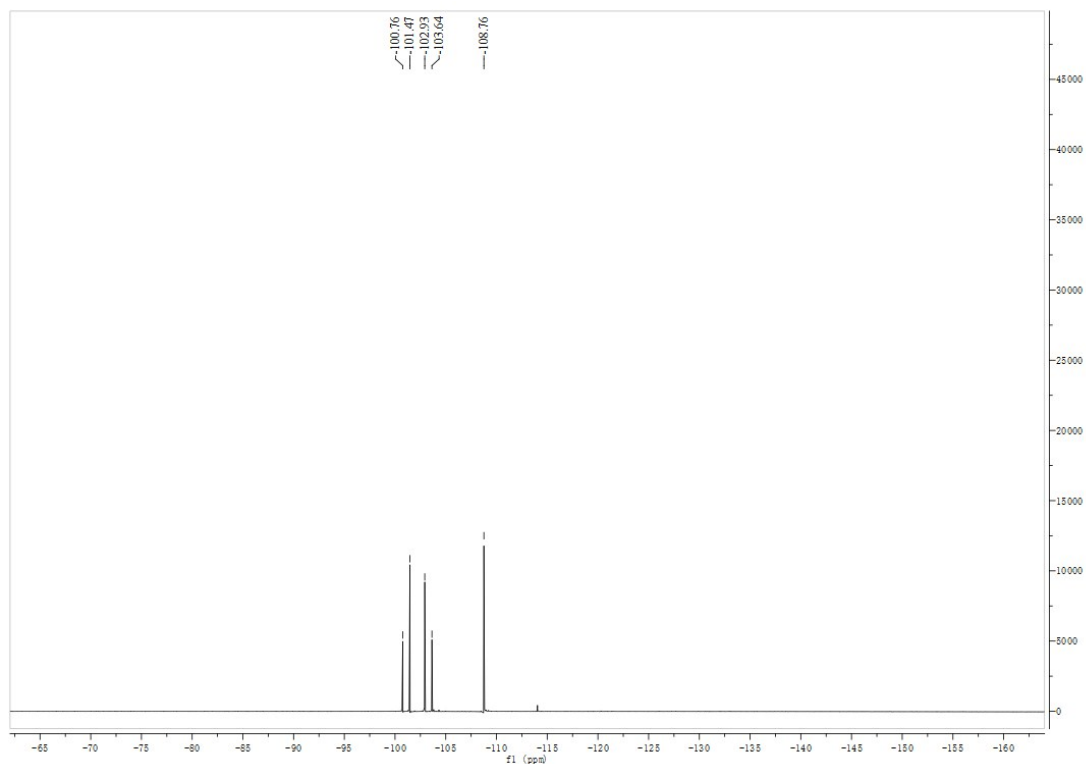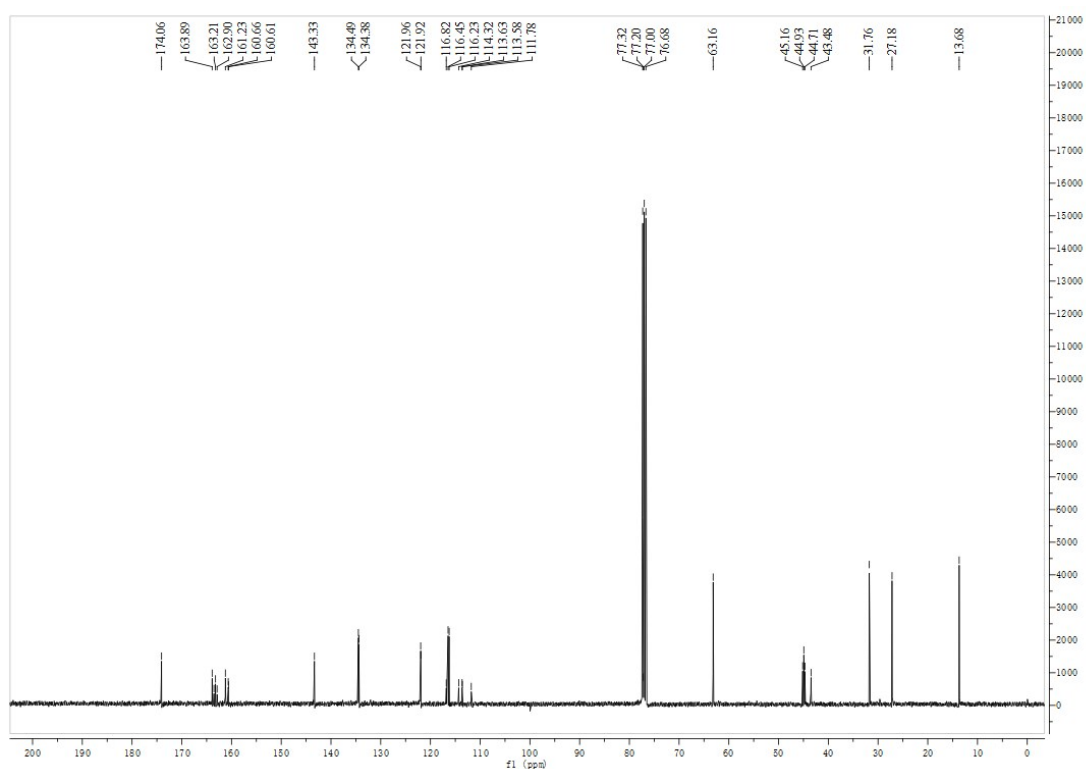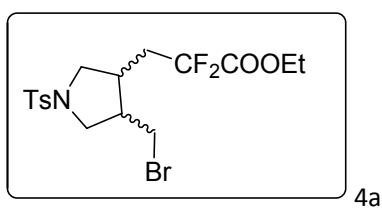

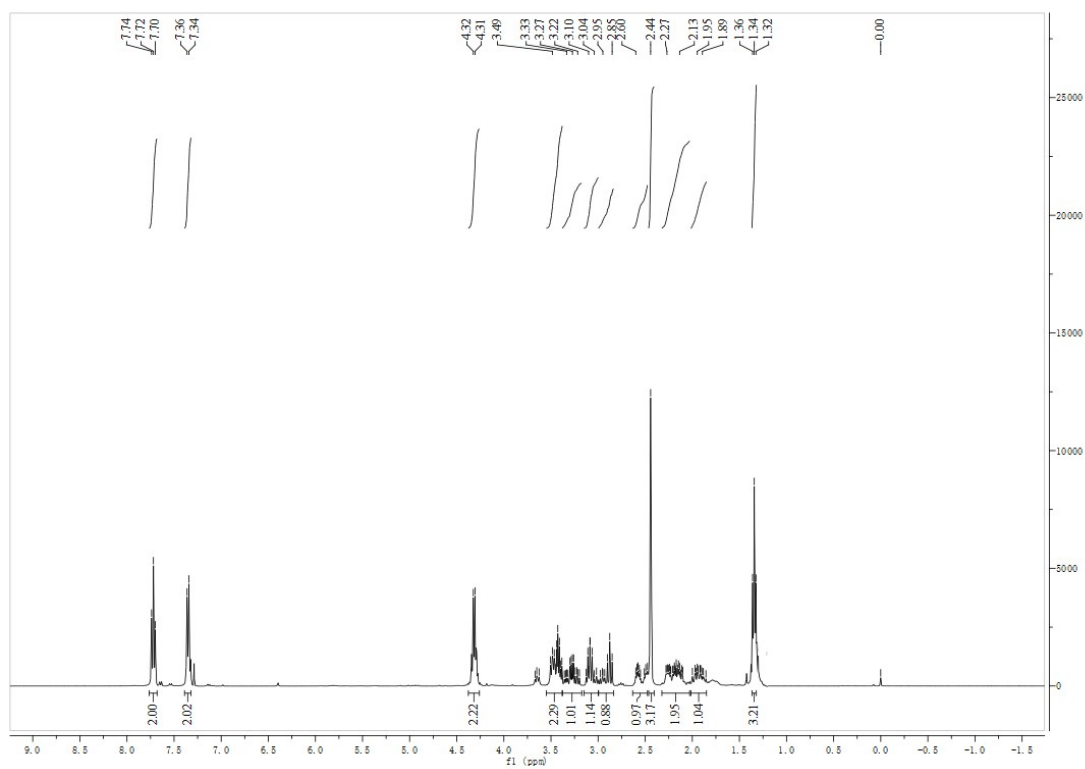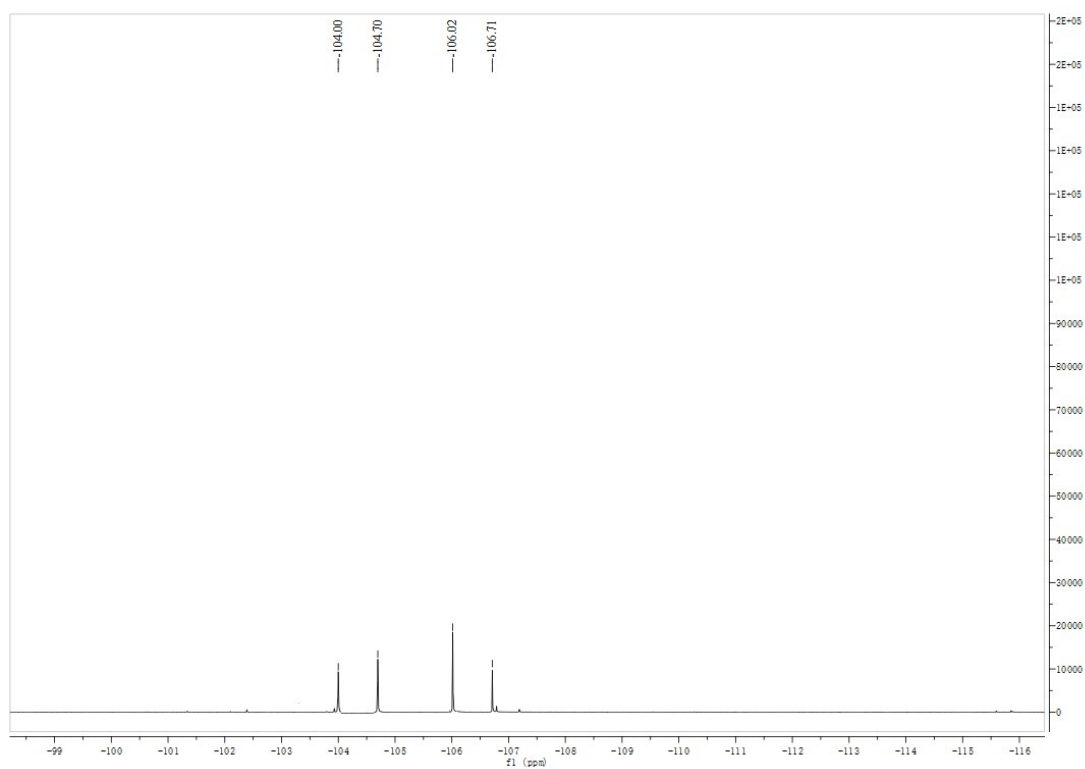

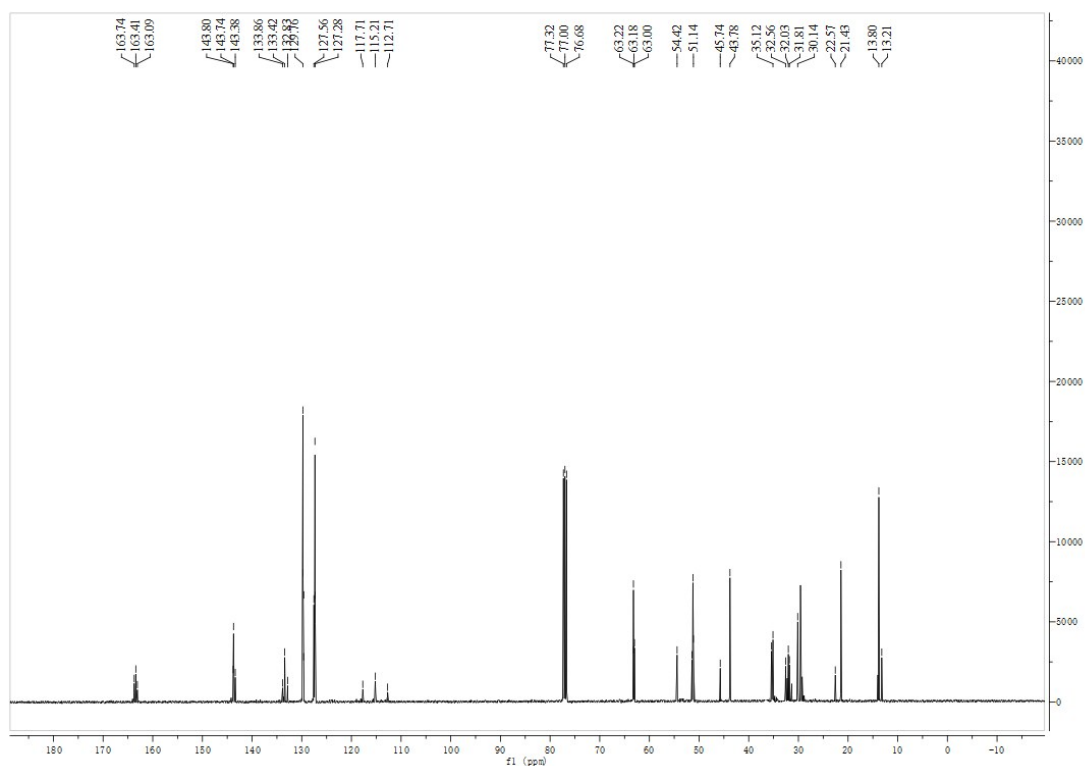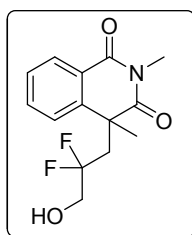

3aa

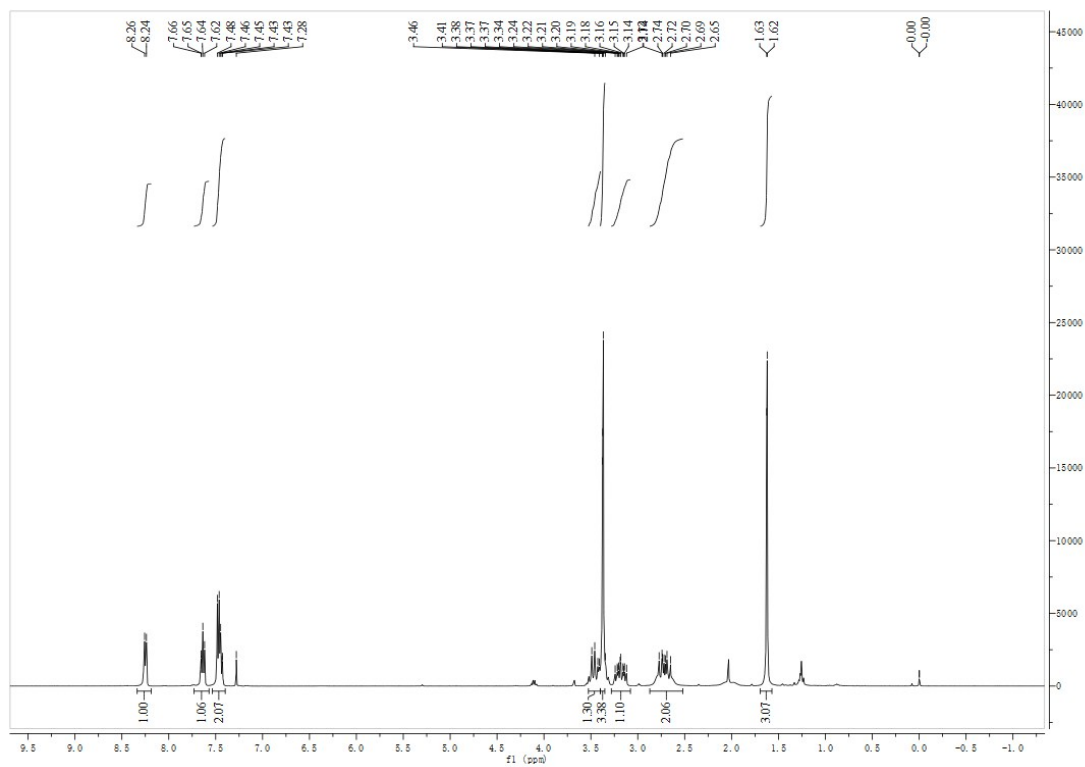

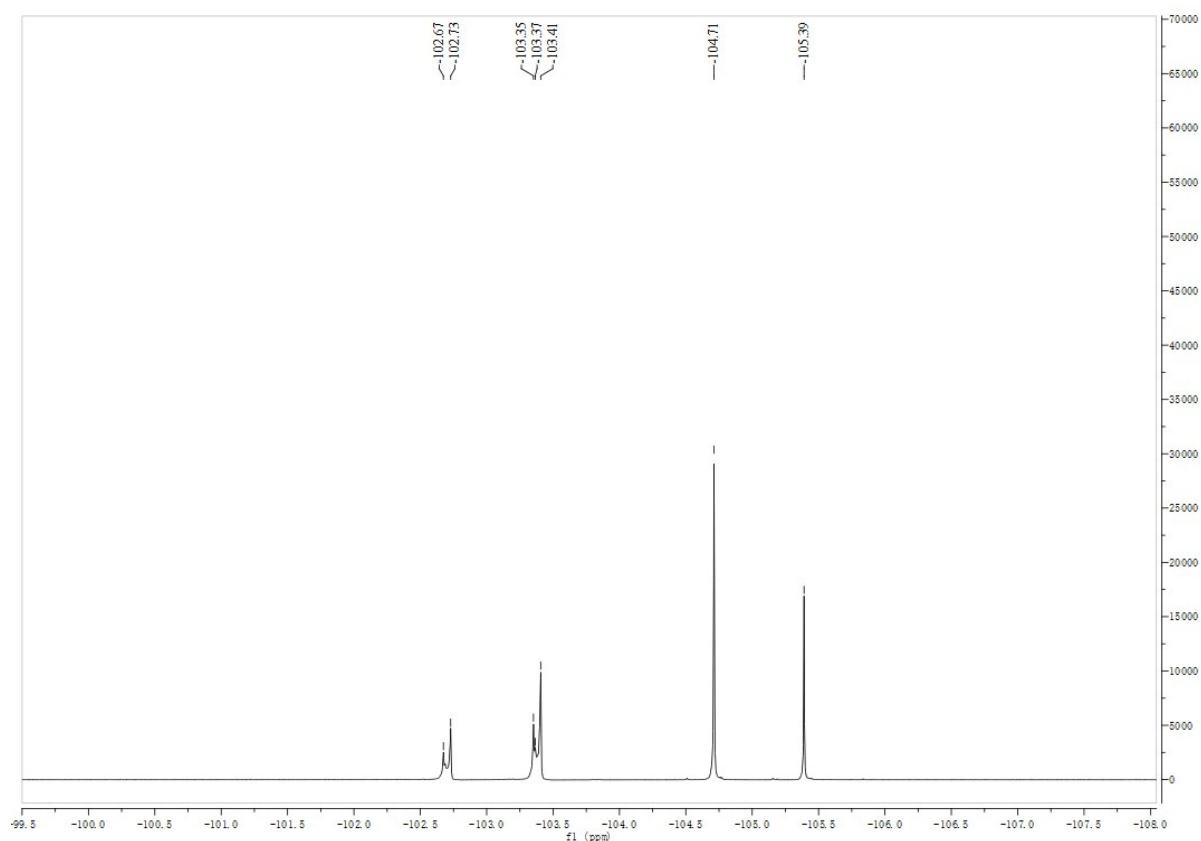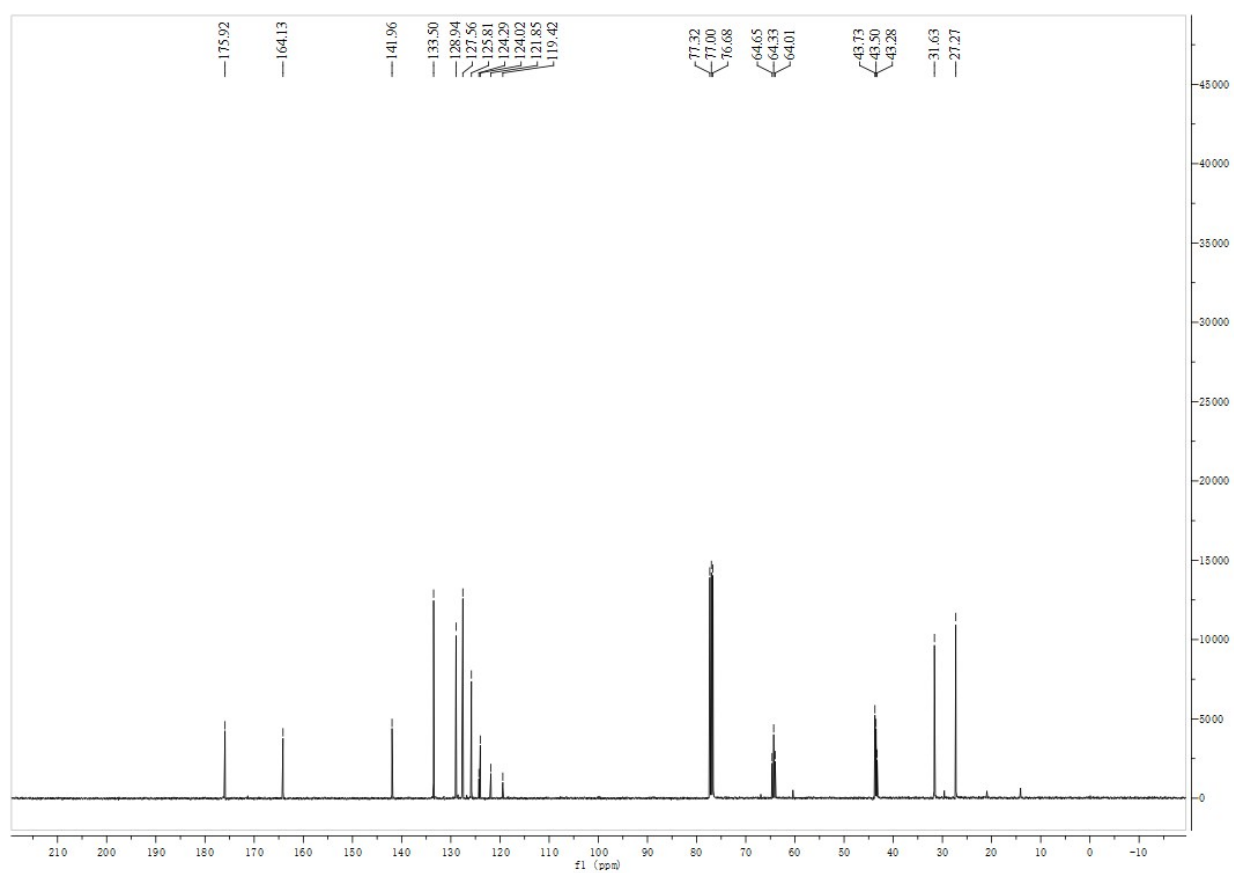

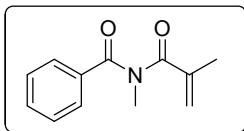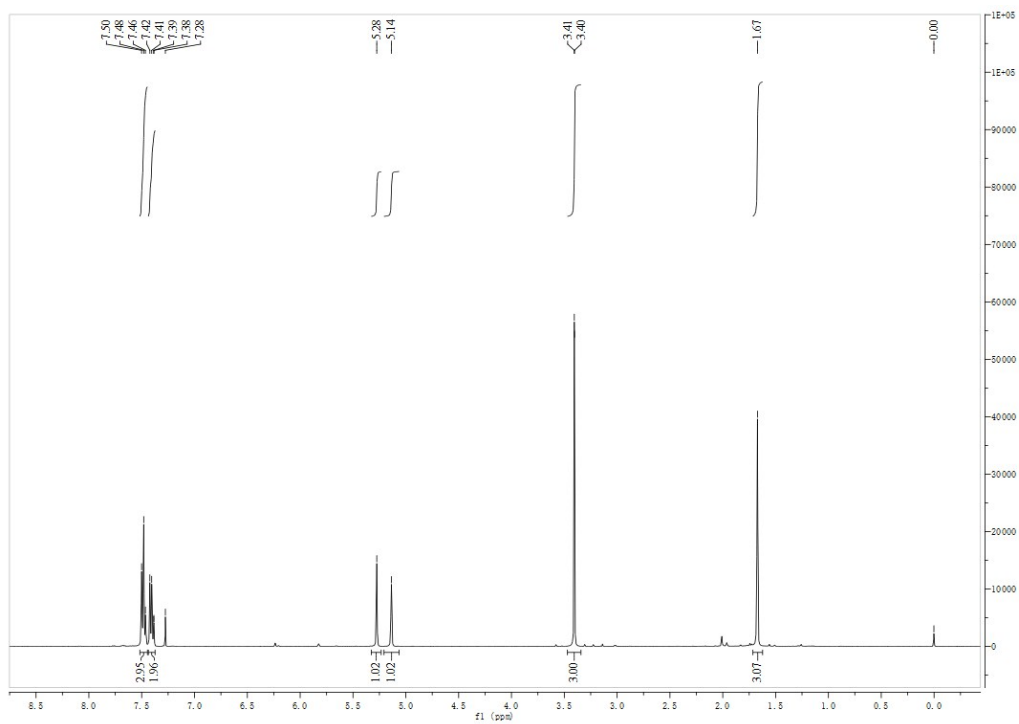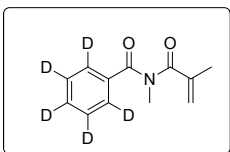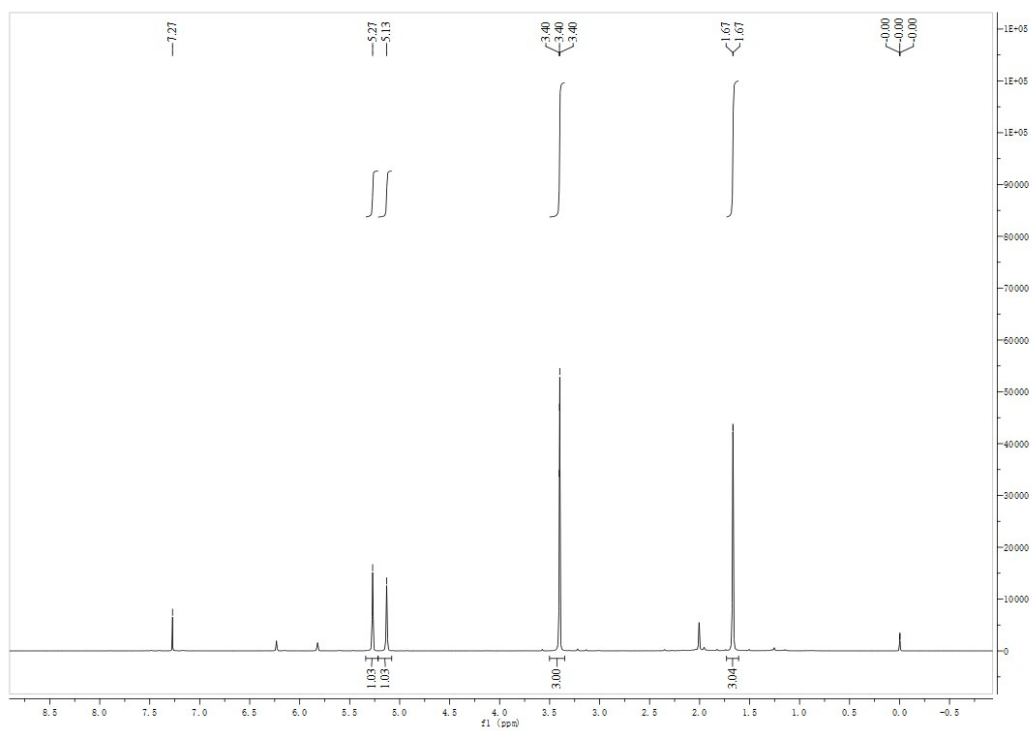

Supplement: c6ra05744f1.pdf [file c6ra05744f1.pdf]
